# Supplementary material for: Applicability of small-scale black carbon sensors to explore high resolution spatial variability of ambient black carbon
Source: Copernicus journal article supplement (doi:10.5194/ar-2024-12), 2024-04-15
Supplement: Supplementary file [file ar-2024-12-RC2-supplement.pdf]

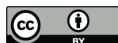

# Applicability of small-scale black carbon sensors to explore high resolution spatial variability of ambient black carbon

J. Tapio Elomaa<sup>1</sup>, Krista Luoma<sup>1,2</sup>, Sami D. Harni<sup>2</sup>, Aki Virkkula<sup>2</sup>, Hilikka Timonen<sup>2</sup>, and Tuukka Petäjä<sup>1</sup>

5 <sup>1</sup>Institute for atmospheric and Earth system research / Physics, Faculty of Science, University of Helsinki, Helsinki, Finland  
<sup>2</sup>Atmospheric Composition Research, Finnish Meteorological Institute, Helsinki, Finland

*Correspondence to:* J. Tapio Elomaa (tapio.elomaa@helsinki.fi)

**Abstract.** Black Carbon (BC) is a particulate pollutant emitted as a by-product of combustion. BC has an emerging role in air quality monitoring with the current recommendations by the World Health Organization, that systematic measurements of BC should be conducted to capture the temporal and spatial variability of BC. To observe this variability, especially in urban areas, a large quantity of sensor-type measurements is required. In this study, four different types of small-scale filter-based BC sensors (AE51, MA200, MA350, Observair) were used to build a sensor network in Kumpula campus, Helsinki, Finland. Our aim was to test the applicability of the sensors to monitor ambient BC concentrations in field conditions and to study the variation of BC in high resolution. The results were compared to a reference level instrument (MAAP) for validation. During intercomparisons, the sensors had a good correlation with the reference and after a simple orthogonal regression calibration, were deemed suitable for deployment in the sensor network. During deployment, the sensor network proved to be able to capture small scale temporal and spatial differences in BC concentrations and showed potential for source-apportionment applications. The changes in temperature ( $T$ ) and relative humidity ( $RH$ ) were observed to induce error in the BC measurements. This error was amplified by the dualspot correction, which was worsening the measurement result under instable conditions of  $T$  and  $RH$ . This should be considered when using sensors that apply this correction automatically. The environmental compensation used by the Observair sensors reduced the error from the changing  $T$  and  $RH$ . To reduce the effect of changing  $T$  and  $RH$ , more robust environmentally controlled boxes should be developed or correction algorithms, such as environmental compensation, should be applied.

## 1 Introduction

25 Black carbon (BC) is a typical aerosol particle component in the **urban air**. BC consists of carbonaceous material that efficiently absorbs light at visible wavelengths and therefore appears black. It is emitted to the atmosphere as a by-product of incomplete combustion, such as traffic and biomass combustion. BC has remarkable effects on both climate and air quality (Bond et al., 2013).



30 BC affects the climate directly by interacting with radiation and indirectly via complex aerosol-cloud interactions (Stocker et al., 2013). Due to its absorbing nature, BC has a warming effect on the climate. The warming effect is enhanced if BC is emitted or transported in the Arctic area where it speeds up the melting of snow and ice sheets by deposition (Räisänen et al., 2022; Sand et al., 2013). On some estimates, BC is the second greatest warming agent in the atmosphere (Bond et al., 2013; Stocker et al., 2013).

35 From the air quality viewpoint, BC is an air pollutant with adverse health effects. Since BC particles fall typically in the size range of ultrafine particles (diameter < 100 nm), they can be transported into the deepest part in the human respiratory system, from there to the blood circulation system, and eventually end up even in the brain and other vital organs (Janssen et al., 2011; Segersson et al., 2017). In the long run, inhaled fine aerosol particles cause cardiovascular and respiratory diseases as well as cancer (Lequy et al., 2021; Ravindra, 2019). Lelieveld et al. (2015) estimated that globally exposure to atmospheric aerosol matter, here defined as the total mass of particles smaller than 2.5 µm in diameter (PM<sub>2.5</sub>), cause 1.9 million premature deaths per year.

40 Emissions from combustion consist of large concentrations of fine particles and toxic materials, thus combustion related aerosol particles have been shown to have more adverse health effects than particulate matter from other sources (Krzyzanowski et al., 2005). Also, BC, which is a by-product of combustion, has been shown to be a better indicator of the adverse health effects of atmospheric aerosol particles than the commonly monitored PM<sub>2.5</sub> (Janssen et al., 2011). In the recent air quality guidelines, WHO recommends starting systematic measurements of BC in urban areas to reduce the uncertainty related to temporal and spatial variability of BC concentrations as well as its health, air quality, and climate impacts (WHO, 2021). Even though of the recommendations to monitor BC, there are yet no limit values regarding BC concentration due to lack of epidemiological exposure studies.

50 Due to the various sources and rather short lifetime (compared to greenhouse gases), BC has a lot of temporal and spatial variation, which causes uncertainties in estimating the effects of BC on climate and air quality. Especially in urban areas, the concentration of BC can vary depending on both anthropogenic and natural factors: e.g., traffic rate, local biomass combustion, and weather conditions, orography, or close by buildings that affect the dilution by wind or convection (Caubel et al., 2019; Helin et al., 2018; Luoma, Niemi, et al., 2021). For example, BC concentration can be halved by moving 30m away from a busy traffic lane (Enroth et al., 2016).

55 To capture the spatial and temporal variability of BC in urban areas, a high-resolution sensor network is needed (Caubel et al., 2019). This requires a large quantity of affordable but robust sensors that can be deployed outside in ambient conditions. BC is commonly measured with filter-based methods that are robust, easy-to-use, and have a high time resolution. In the last decade small-scale versions of especially the Aethalometer (Hansen et al., 1984) have been introduced reducing the cost of the sensors in relation to large monitoring instruments by sacrificing some reliability, sensor lifetime and accuracy (Caubel et al., 2018; Holder et al., 2018; Kamboures et al., 2013). In previous studies a common application for these sensors has been



personal BC exposure as a carry-on measurement device (Delgado-Saborit, 2012; Li et al., 2015) or they have been utilized in conjunction with larger monitoring instruments (Chakraborty et al., 2023; Kuula et al., 2020).

The large quantity of sensors inevitably causes technical challenges, for example with maintenance, data acquisition, survivability of the sensors under the changing ambient conditions such as diurnal temperature changes and rain, sensor to  
65 sensor variability and internal sensor drift (Petäjä et al., 2021; Zaidan et al., 2023). Before a wide implementation of sensor networks, pilot deployments are needed to identify the challenges of individual sensor operations and sensor networks. Operating a variety of sensors side-by-side in the same network allows assessment of performance characteristics of different models of BC sensors, and to identify the critical qualities of a good small-scale BC sensor.

The aim of this study is to explore the suitability of four distinct types of filter-based small-scale BC sensors (AE51, MA200,  
70 MA350, Observair) for mapping the spatio-temporal variation of urban BC concentrations. To ensure the measurement quality, we compared the sensors with a Multi-Angle Absorption Photometer (MAAP) in two intercomparison periods at Station for Measuring Ecosystem–Atmosphere Relations III (SMEAR III, Järvi et al., 2009) in Kumpula campus, Helsinki, Southern Finland, from end of May to start of October 2022. In between the two intercomparisons, the sensors were deployed as a sensor network in the surrounding Kumpula campus area. We characterized the applicability of the different  
75 sensor types within the sensor network, and the suitability and challenges regarding their utilization in ambient measurements. Furthermore, we provide preliminary results for the general features of BC concentrations within the Kumpula campus area and its spatio-temporal variation.

## 2 Methods

### 2.1 Measurement method

80 An Aethalometer is a filter-based optical method that is widely used to measure BC concentration due to ease of operation and relatively low cost (Hansen et al., 1984). With this technique, sample air is drawn through a filter material, where aerosol particles collect onto the filter. The attenuation of light through the filter area increases over time due to increased absorption and scattering from the collected particles. The attenuation is described by Eq. 1, where  $I_0$  is the light intensity through a clean filter and  $I$  is the light intensity through a loaded filter:

$$ATN = -\ln(I/I_0) \quad (1)$$

85 The measured variable by the instrument is the attenuation coefficient  $b_{att}(\lambda)$  [ $\text{m}^{-1}$ ] calculated from the observed attenuation coefficient and the operational parameters of the instrument described in Eq. 2, where  $A$  [ $\text{m}^2$ ] is the area of the sample spot,  $Q$  [ $\text{m}^3 \text{s}^{-1}$ ] is the volumetric flow through the sample spot,  $\Delta t$  [s] is the collection time and  $\lambda$  is the wavelength of the light source as the coefficient is wavelength dependent:

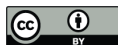

$$b_{ATN}(\lambda) = \frac{A \Delta ATN(\lambda)}{Q \Delta t} \quad (2)$$

To determine the BC concentration from the attenuation coefficient, a series of assumptions are necessary, and some  
90 corrections need to be applied. The attenuation consists of: (1) absorption from the aerosol particles, (2) enhanced  
attenuation from multiple scattering by the filter fibers (multiple scattering), (3) enhanced attenuation from scattering of the  
aerosol particles (scattering) and (4) the saturation of the filter which causes the attenuation to change non-linearly overtime  
(loading effect) (Collaud Coen et al., 2010). In a general form the BC calculation can be presented as

$$eBC = \frac{1}{MAC(\lambda)} \cdot \sigma_{ap}(\lambda) = \frac{1}{MAC(\lambda)} \cdot \frac{f(ATN)b_{ATN}(\lambda) - s(\lambda)\sigma_{sp}(\lambda)}{C_{ref}} \quad (3)$$

where  $\sigma_{ap}(\lambda)$  [ $m^{-1}$ ] is the absorption coefficient (1),  $C_{ref}$  is the multiple scattering correction factor (2),  $s(\lambda)$  is a fraction of the  
95 scattering coefficient  $\sigma_{sp}(\lambda)$  [ $m^{-1}$ ] (3),  $f(ATN)$  is a loading correction function (4), and  $MAC(\lambda)$  [ $m^2 g^{-1}$ ] is the mass absorption  
cross section (Virkkula et al., 2015). The results are given as equivalent black carbon ( $eBC$ ) denoting the conversion of the  
absorption coefficient to concentration with the use of a specific MAC value (Petzold et al., 2013).

The assumptions are that with 880 nm light source the absorption is only from BC particles minimizing the effect of  
absorbing organic carbon species (i.e., brown carbon, BrC) which absorb on shorter wavelengths. Hence all optical variables  
100 are determined at this wavelength. The multiple scattering factor  $C_{ref}$  depends on the filter material and instrument used.  
Most commonly a constant value is used appropriate for the instrument and filter material. It is to be noted that the  $C_{ref}$  value  
can have a large variability depending on seasons, location, and methodology of determination (Collaud Coen et al., 2010;  
Backman et al., 2017; Di Biagio et al., 2017; Bernardoni et al., 2021; Luoma et al., 2021). The scattering correction requires  
measurement of the scattering coefficient which in many cases is not possible due to the lack of instrumentation and this  
105 correction is **assumed to be unity as in this study**. For the loading correction, a plethora of options are available (Arnott et al.,  
2005; Bond et al., 1999; Collaud Coen et al., 2010; Drinovec et al., 2015; Hyvärinen et al., 2013; Kirchstetter & Novakov,  
2007; Luoma et al., 2019; Schmid et al., 2006; Virkkula et al., 2007; Weingartner et al., 2003). In this study, the dualspot  
correction by Drinovec et al. (2015) was tested. The correction was selected as it is the most recent one, it is widely used  
with Aethalometer model AE33 and **it is inbuilt to the design of MA200 and MA350 sensors** that were utilized in this  
110 campaign (see Sect. 2.2). For the MAC value a constant value is **commonly used** with the assumption that the measured BC  
is freshly emitted (Bond et al., 2013; Bond & Bergstrom, 2006; Liu et al., 2020).



## 2.2 Dualspot correction algorithm

The dualspot correction is a scheme to correct for the loading effect by relating two measurement spots with differing flows. The correction is seen in Eq. 4, where  $eBC_{NC}$  is the uncorrected measurement,  $k$  is the compensation parameter and  $\zeta$  is the lateral airflow leakage factor within the filter matrix.

$$eBC = \frac{eBC_{NC}}{(1 - k \cdot ATN)} \frac{1}{(1 - \zeta)} \quad (4)$$

The  $\zeta$  is determined as a difference of input and output flow ( $F_{input} = F_{output}(1 - \zeta)$ ), which is caused by a minor leak through the sample filter. For AE33 it is in 0.02-0.07 range as reported by Drinovec et al. (2015) and the mean 0.045 is used in our application. The  $k$  is determined numerically from the overall loading of the two filter spots as seen in Eq. 5, where subindices  $L$  and  $H$  refer to the low and high flow spots, respectively.  $FVRF$  is the face velocity ratio factor.

$$\frac{Q_L}{Q_H} \cdot FVRF = \frac{\ln(1 - k \cdot ATN_L)}{\ln(1 - k \cdot ATN_H)} \quad (5)$$

As the  $k$  is very sensitive to errors in sample flow measurements, the additional empirical factor  $FVRF$  is implemented to reduce the sample flow measurement uncertainty. The  $FVRF$  is calculated by plotting  $ATN_L/ATN_H$  to  $ATN_H$  and taking the intercept of a linear fit. The linear fit is done when  $ATN_H$  is between  $ATN_{f1}$  and  $ATN_{f2}$  with example values being 10 and 30 respectively. The lower limit ( $ATN_{f1}$ ) is set to minimize the effect of particle transients in the fresh filter spot and the upper limit ( $ATN_{f2}$ ) is set low enough so that the data are not yet affected by the loading effect. This should ensure that at the low loading the  $ATN$  and flow ratios of the two spots are proportional to each other and therefore the sample flow measurement error can be minimized with the  $ATN$  measurements.

Due to the determination of the  $FVRF$  and the  $k$  being unstable at low loadings and more accurate at high loadings, the  $k$  is additionally weighted according to Eq. 6, where  $k_w$  is the weighted  $k$ ,  $ATN_{TA}$  is the tape advance trigger (default 120 at 370 nm) and  $k_{old}$  is the  $k$  calculated from a previous filter spot i.e. before the tape advance:

$$k_w = \frac{(ATN_{TA} - ATN_H)k_{old} + (ATN_H - ATN_{f2})k}{(ATN_{TA} - ATN_{f2})} \quad (6)$$

All in all, the weighing results in that for most of the time the static  $k_{old}$  value is used, and the real time determined  $k$  according to Eq. 5 rises in importance at higher loadings and closer to the times when the tape advance is triggered. The final



weighted  $k_w$  at full loading is equal to the real time determined  $k$ . The correction is applied to the high flow spot with the weighted  $k_w$  and Eq. 4 real time during the measurements.

### 2.3 Small BC sensors

135 We used four types of small-scale black carbon sensors and one reference instrument. The sensors were AE51 (2 units), MA200 (1 unit) and MA350 (1 unit) by Aethlabs and Observair (OBS, 4 units) by Distributed Sensing Technologies. As the reference instrument, we used the Multi-Angle Absorption Photometer (MAAP) by Thermo Fischer Scientific (Petzold & Schönlinner, 2004).

The sensor specifications are given in Table 1. All small-scale sensors can be operated with flow rates between 50-200  
140 ml/min. AE51 and Observair measure with one wavelength at 880 nm while the MA-sensors measure with 5 wavelengths (880 nm, 625 nm, 528 nm, 470 nm, 375 nm). All sensors calculate the  $eBC$  concentration with the 880 nm wavelength according to the assumption to minimize the effect of BrC. The MA-sensors have an inbuilt capability for the dualspot correction and therefore two separate measurement spots and one reference spot. The AE51 and Observair have one measurement spot and one reference spot. The AE51 and Observair sensors were run in pairs for the prospect of the dualspot  
145 correction (see Sect. 3.2.). The filter materials were for the AE51 Teflon coated quartz fibers (T60), for the MA- sensors polytetrafluoroethylene (L15 or L85 filter cartridge) and for the Observair the filter material was described as fibrous filter material (Distributed Sensing Technologies, 2023). AE51 and Observair had single-use filters that needed to be replaced regularly, in our case every 4-5 days. The MA-sensors have filter cassettes that automatically change the filter spot after a high loading limit is reached. In our case the filter was set to change when  $ATN$  was higher than 100 at any wavelength (most  
150 likely the lowest wavelength of 375 nm), but the setting can be changed between 1-100. The MA200 filter cassette has 15 spots and the MA350 has 85 spots. The filter sample spot is  $7.1 \text{ mm}^2$  for all sensor types and all sensors use the same MAC value of  $7.8 \text{ m}^2 \text{ g}^{-1}$ . The  $C_{ref}$  value for AE51 is 1.6 and for the other sensors 1.3. All sensors have additional measurements of temperature and relative humidity (RH) and the Observair sensors utilize environmental compensation technology to compensate for sharp changes in temperature or RH.

155 The reference instrument MAAP differs from the Aethalometer by additionally measuring scattering to improve the accuracy of the absorption coefficient and  $eBC$  result. The flow rate was set to 5 l/min. The instrument measures with only one wavelength at 670 nm. The filter tape is made with glass fiber and the tape advance is automatic. In our case, the filter tape needs to be changed on average every 6 months. The measurement spot is considerably larger,  $2 \text{ cm}^2$  in comparison to the small-scale sensors, which was  $7.1 \text{ mm}^2$ .

160



**Table 1.** *Black carbon sensors.*

| Parameter                                   | AE51                             | MA200                    | MA350                    | Observair | MAAP                  |
|---------------------------------------------|----------------------------------|--------------------------|--------------------------|-----------|-----------------------|
| Flow rate<br>[ml min <sup>-1</sup> ]        | 50-200                           | 50-150                   | 50-150                   | 50-200    | 5000                  |
| Number of<br>wavelengths                    | 1                                | 5                        | 5                        | 1         | 1                     |
| Measurement<br>interval [s]                 | 1-300                            | 1-300                    | 1-300                    | 2-60      | 300                   |
| Filter material                             | Teflon<br>coated<br>quartz fiber | Polytetrafluoroethylene  | Polytetrafluoroethylene  | Fibrous   | Glass fiber<br>(GF10) |
| Filter usage                                | Single                           | A cassette with 15 spots | A cassette with 85 spots | Single    | Tape ~40 m            |
| Sample spot area<br>[mm <sup>2</sup> ]      | 7.1                              | 7.1                      | 7.1                      | 7.1       | 200                   |
| <b>MAC [m<sup>2</sup> g<sup>-1</sup>]</b>   | 7.8                              | 7.8                      | 7.8                      | 7.8       | 6.6                   |
| $C_{ref}$                                   | 1.6                              | 1.3                      | 1.3                      | 1.3*      | Measured              |
| Limit of detection<br>[ng m <sup>-3</sup> ] | ± 100                            | ± 30                     | ± 30                     | ± 50      | ± 50                  |

#### 2.4 Deployment/measurement area and SMEAR III

The field campaign was conducted at the Kumpula Campus area located approximately 4 km northeast from the center of Helsinki, Finland. Helsinki is the capital of Finland located in the south at the coast of the Gulf of Finland. The metropolitan area consists of four cities with a combined population of 1.2 million people (Tilastokeskus, 2023). The main sources of BC in the region are from road traffic, wood burning, maritime traffic and transboundary air pollution (Helin et al., 2018; Teinilä et al., 2022). In 2022, the air quality in the region was good or satisfactory 90% of the time (Helin et al., 2018; Korhonen et al., 2022; Teinilä et al., 2022).

The Kumpula campus area was selected due to easy access for deployment, maintenance, and upkeep. The area consists of variable surroundings with green space, detached housing zones and a relatively high-capacity road. In addition, there was an active construction site in the area during the measurements. Two intercomparison periods were measured during 26.5. –

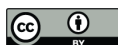

6.6.2022 (11 d) and 16.9. – 3.10.2022 (17 d) at the Station for Measuring Ecosystem–Atmosphere Relationships III (SMEAR III, 60°12'N, 24°58'E, 26 m above sea level, (Järvi et al., 2009)). In between the intercomparisons 4.7. – 16.9.2022 (74 d), the sensors were deployed to the locations seen in Fig. 1.

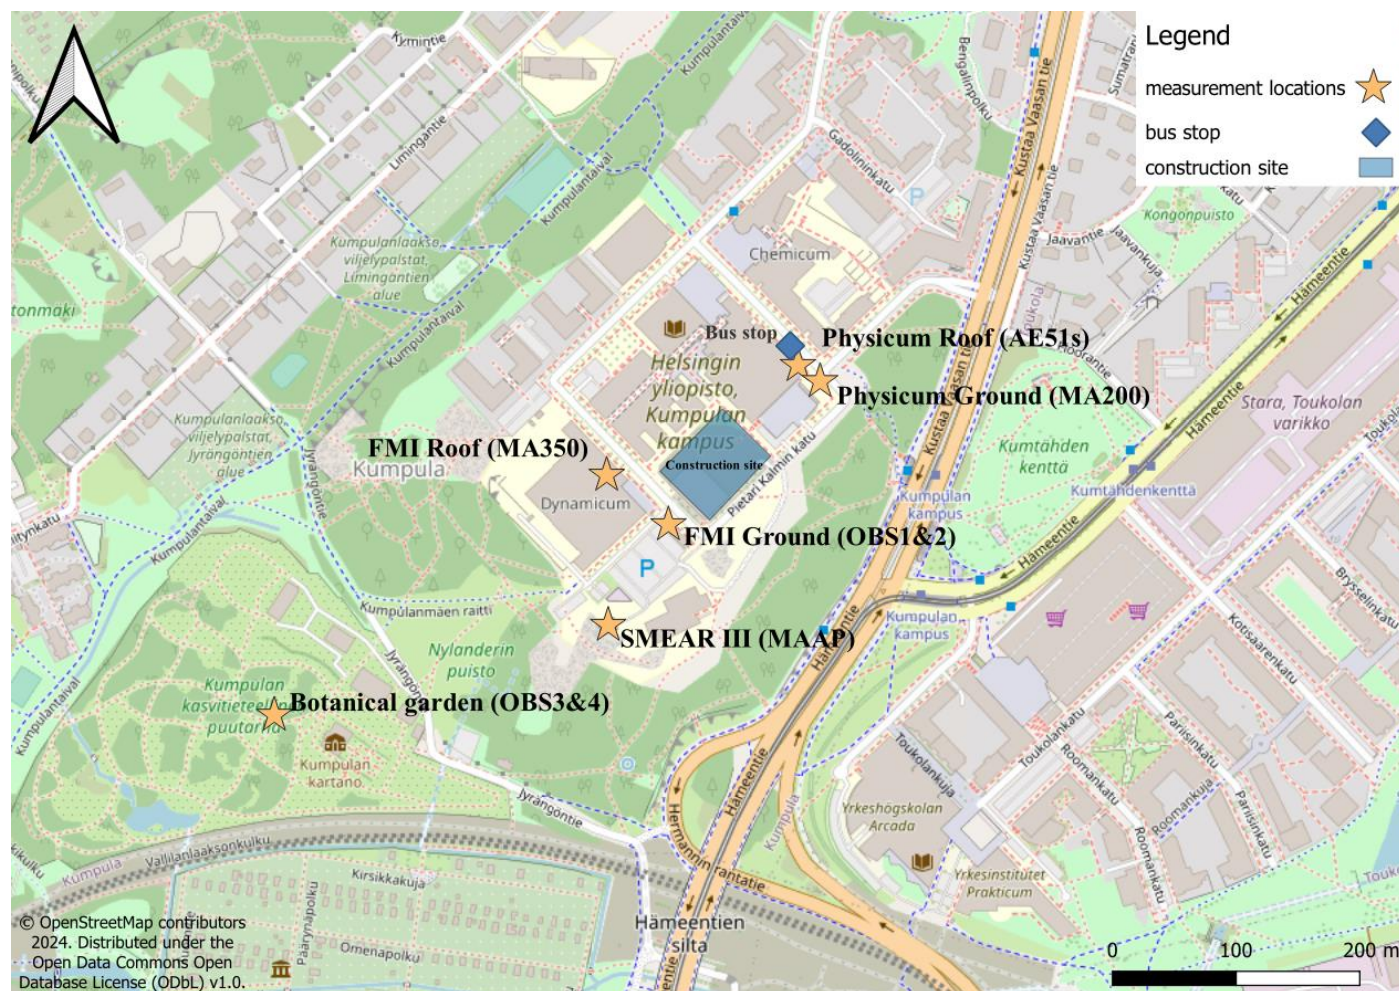

**Figure 1.** Map of the deployment locations in the Kumpula campus area.

Kumpula campus is located on a small hill 26m above sea level. On the Kumpula campus area's southwestern side is the Kumpula botanical garden and park area with trees and vegetation. In the center lies the main university buildings in addition to the Finnish meteorological institute (FMI) with a few four-story apartment blocks. Further north there is a low-density residential area of mainly wooden houses with more park area. On the eastern side there is a road to the city center, Kustaa Vaasan tie. Kustaa Vaasan tie is used by approximately 38000 – 42000 vehicles per day with around 10% being heavy vehicles (kartta.hel.fi, 2024). Beyond the road lies Toukola residential area with much larger apartment blocks in comparison to the northern side and a small shopping center. The campus area has a bus line going through it with the bus stops marked

180



185 as small blue squares in Fig 1. Locally, BC is emitted by traffic and wood combustion on the detached housing areas and communal garden.

During the intercomparisons at the SMEAR III, the reference instrument MAAP was used with a pre-impactor removing particles larger than 1  $\mu\text{m}$  in diameter from the sample flow. The inlet was positioned 10 m height from the ground. The small-scale sensors were used without any inlet pre-impactor. The inlets were set up through the SMEAR III station wall at a height of 3 m from the ground.

190 The deployment locations are described in Table 2. In some locations, two sensors were deployed for redundancy and the possibility of applying the dualspot correction. Physicum roof ( $P_{\text{roof}}$ ) is located in the Physicum 4<sup>th</sup> floor laboratory with inlets set up through a hole in the wall approximately 15 m from the ground. Two AE51 sensors were set up in this location inside on a table in a stable air-conditioned laboratory space. On ground level ( $P_{\text{ground}}$ ), near the laboratory, resides a gas storage. A MA200 sensor was deployed there in a weatherproof B&W Type 3000 box approximately 1.5 m above the  
195 ground. On the road, next to these two locations, resides a bus stop. On the FMI roof ( $F_{\text{roof}}$ ), a MA350 was deployed in a similar B&W Type 3000 box. The height was approximately 18 m above the ground. The deployment was done by strapping the box to wooden fencing surrounding a rooftop patio. On the ground level ( $F_{\text{ground}}$ ) two Observair sensors (OBS1 and OBS2) were deployed in the inside of a bike shed 1.5 m above the ground. A box provided by the sensor developer was used, which is analogous to the B&W Type 3000. MAAP continued measuring at SMEAR III during the whole deployment  
200 with the same setup as in the intercomparisons. Next to these three locations is the FMI parking lot. The last location was the Kumpula botanical garden ( $BG_{\text{ground}}$ ). Two Observair sensors (OBS3 and OBS4) were deployed here in B&W Type 3000 box by attaching the box to a tree at a height of 1.5 m. Overall the roof and ground pairings can be used to compare the vertical profiles of their respective locations. The sensors were flow calibrated during the measurement campaign and the timing and results are outlined in the supplement.

205



**Table 2.** Information of BC sensor deployment locations (height, type, container), deployment lengths and indicated issues related to their operation in this study.

| Location           | P <sub>roof</sub>                                                                                                                                                                                                     | P <sub>ground</sub> | F <sub>roof</sub>                                                           | F <sub>ground</sub>                             | BG <sub>ground</sub>                                                                                     | SMEARIII <sub>ground</sub> |
|--------------------|-----------------------------------------------------------------------------------------------------------------------------------------------------------------------------------------------------------------------|---------------------|-----------------------------------------------------------------------------|-------------------------------------------------|----------------------------------------------------------------------------------------------------------|----------------------------|
| Height             | 15 m                                                                                                                                                                                                                  | 1.2 m               | 18 m                                                                        | 1.2 m                                           | 1.2 m                                                                                                    | 10 m                       |
| Sensor type and ID | AE51_1408<br>AE51_1409                                                                                                                                                                                                | MA200-0187          | MA350-0104                                                                  | OBS1 (OBS_15)<br>OBS2 (OBS_71)                  | OBS3<br>(OBS_74)<br>OBS4<br>(OBS_37)                                                                     | MAAP                       |
| Container          | Inside                                                                                                                                                                                                                | B&W Type<br>3000    | B&W Type<br>3000                                                            | Observair's own<br>box                          | B&W Type<br>3000                                                                                         | Inside                     |
| Deployment length  | Full                                                                                                                                                                                                                  | Full                | Partial                                                                     | Full                                            | Full                                                                                                     | Full                       |
| Issues             | No issues                                                                                                                                                                                                             | Temperature<br>dips | Temperature,<br>inlet blocked<br>22.7 ->, full<br>failure of spot 2<br>19.7 | Overheating due<br>to heater and low<br>battery | Occasionally<br>overheating,<br>missing-><br>11-17.8<br>OBS3, 13-<br>21.7 OBS4,<br>due to low<br>battery | No issues                  |
| Notes              | Bus stop                                                                                                                                                                                                              | Bus stop            | Spot1 good                                                                  | Parking lot                                     | Minimal car<br>traffic                                                                                   | Parking lot 10 m<br>high   |
| Data handling      | No dualspot. Data are deleted around filter changes, after restart and when it is clearly erroneous (inlet blocks, pump failure). OBS3 data are patched with OBS4 when missing. Calibrating with orthogonal line fit. |                     |                                                                             |                                                 |                                                                                                          |                            |



## 2.5 Data analysis

210 During data processing, data were removed near filter changes. A sharp  $ATN$  change ( $|\Delta ATN| > 30$ ) was manually identified and two hours of data were removed starting from the nearest hour before the filter change. This was done for all small-scale sensors.

During the deployment starting from 19.7.2022 the MA350 at  $F_{\text{roof}}$  had flows significantly lower than the set value. This was most likely due to inlet blockage and the start of a pump failure. Data were removed from this point forward as it was  
215 deemed erroneous. The sensor suffered a total pump failure when attempted to move it to SMEAR III for the 2nd intercomparison (see Sect. 3.2.5).

OBS3&4 located at  $BG_{\text{ground}}$  had shutdowns due to low battery during the deployment. When the sensors restarted after the shutdowns the data had erroneous starting spikes. Two hours of data were removed starting from the nearest hour before the restarts. Due to the shutdowns a missing section of OBS3 data are patched with OBS4 data during the deployment. This was  
220 done so that the  $BG_{\text{ground}}$  location has a continuous time series. The sensor-to-sensor variability was deemed low enough as a justification for this process.

Python3 was used for most of the data analysis with `numpy`, `scipy`, `matplotlib`, `pandas`, `seaborn` and `mpl-scatter-density` packages. For the wind plots R with the `openair` library was used.

## 3. Results

### 225 3.1 Intercomparison period results

Before and after the deployment, intercomparison measurements were conducted at the SMEAR III to study the differences between the sensor types and the individual units. The sensors were measuring ambient BC concentrations parallel with the reference instrument MAAP. The intercomparison measurements were conducted during 26.5. – 6.6. 2022 (11 d) and 16.9. –  
230 3.10. 2022 (17 d). All the sensors were tested in the 1<sup>st</sup> intercomparison (AE51 x2, MA200, MA350, OBS x4). During the deployment MA350, OBS1 and OBS2 were damaged and therefore weren't tested in the 2<sup>nd</sup> intercomparison. Time series of the intercomparisons can be seen in Fig. 2 in 5-minute averages. Correlation of all the sensors in relation to the reference instrument MAAP is seen in Fig. 3 with an orthogonal regression. The values of the orthogonal regression line fit are listed in Table 3. For MA-sensors, spot 1 data are used instead of dualspot corrected data (see sect. 3.1.2).

With 5-minute averaging all sensors showed a good Pearson correlation between 0.78-0.85 during the 1<sup>st</sup> intercomparison  
235 period. Results of AE51 sensors were very comparable with both having an intercept of 42 and slope of 0.84. During this time AE51<sub>1408</sub> and AE51<sub>1409</sub> were run with a flow rate of 150 ml/min between 26.5. – 31.5. (5 d) and 100 ml/min and 200 ml/min between 1.6. – 6.6. (6 d) respectively. During the second intercomparison, there were a larger difference where the



240 higher flow rate sensor AE51<sub>1409</sub> (200 ml/min) had a weaker intercept, slope, and correlation of 55.6, 0.70 and 0.92 in comparison to the respective values for AE51<sub>1408</sub> (100 ml/min) of 48.5, 0.78 and 0.94. Both sensors showed improved correlation but weaker slope and intercept.

The MA-series sensors showed similar results where the sensors were comparable to each other with MA200 having intercept, slope, and correlation of 51.5, 1.08 and 0.85 during the 1<sup>st</sup> intercomparison. The respective values for MA350 were 42.5, 1.13 and 0.83. MA350 did not survive for the 2<sup>nd</sup> intercomparison. The MA200 showed better performance during the 2<sup>nd</sup> intercomparison with a correlation of 0.92 and lower intercept of 28.6. The slope reduced to 0.90. The correlation of the 245 MA-series sensors was comparable to the AE51 sensors, but on average the MA-series sensors measured higher concentrations of *eBC*.

From the Observair sensors OBS1 was an older sensor that had been utilized in previous campaigns while OBS 2,3 and 4 were new. OBS1 and 3 were run with flow rates of 145 ml/min and OBS2 and 4 were run with flow rates of 100 ml/min during both intercomparisons if available. The sensors showed very good comparability with correlations in the range of 250 0.82-0.84 during the 1<sup>st</sup> intercomparison. The higher flow sensors (OBS1&3) measured slightly higher concentrations than the lower flow sensors (OBS2&4). During the 2<sup>nd</sup> intercomparison the same pattern was observed where OBS3 measured slightly higher concentrations compared to OBS4. The reduction of slopes was more drastic during 2<sup>nd</sup> intercomparison with OBS sensors than AE51s or MA200.

In general, all sensors that were available performed better during the 2<sup>nd</sup> intercomparison. The correlations were 255 comparable, but there are slight differences on the base *eBC* level between the sensor types. A diurnal cycle can be seen in the intercomparison time series (Fig. 2), where concentrations increase sharply during the mornings and slightly during late evenings. The 1<sup>st</sup> intercomparison has on average lower concentrations compared to the 2<sup>nd</sup> intercomparison. Figure 3. shows the correlation between sensor units and MAAP for BC.

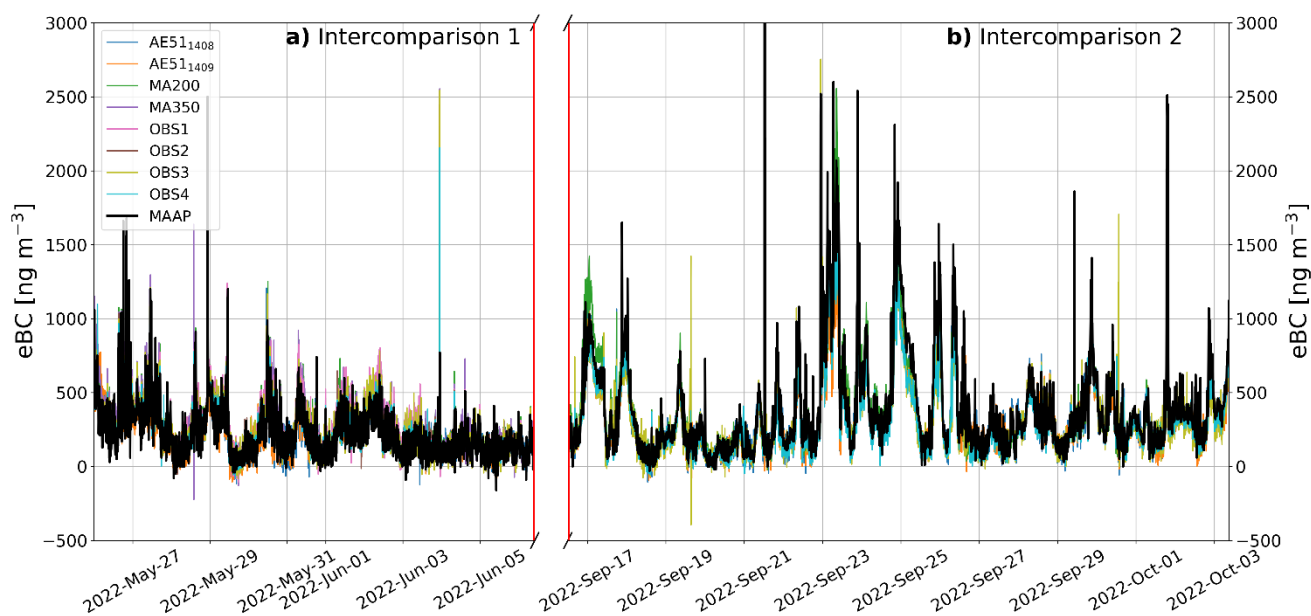

260 **Figure 2.** *Timeseries* of both intercomparison periods a) 26.5. – 6.6.2022 and b) 16.9. – 3.10.2022. Data points are 5-minute averages.

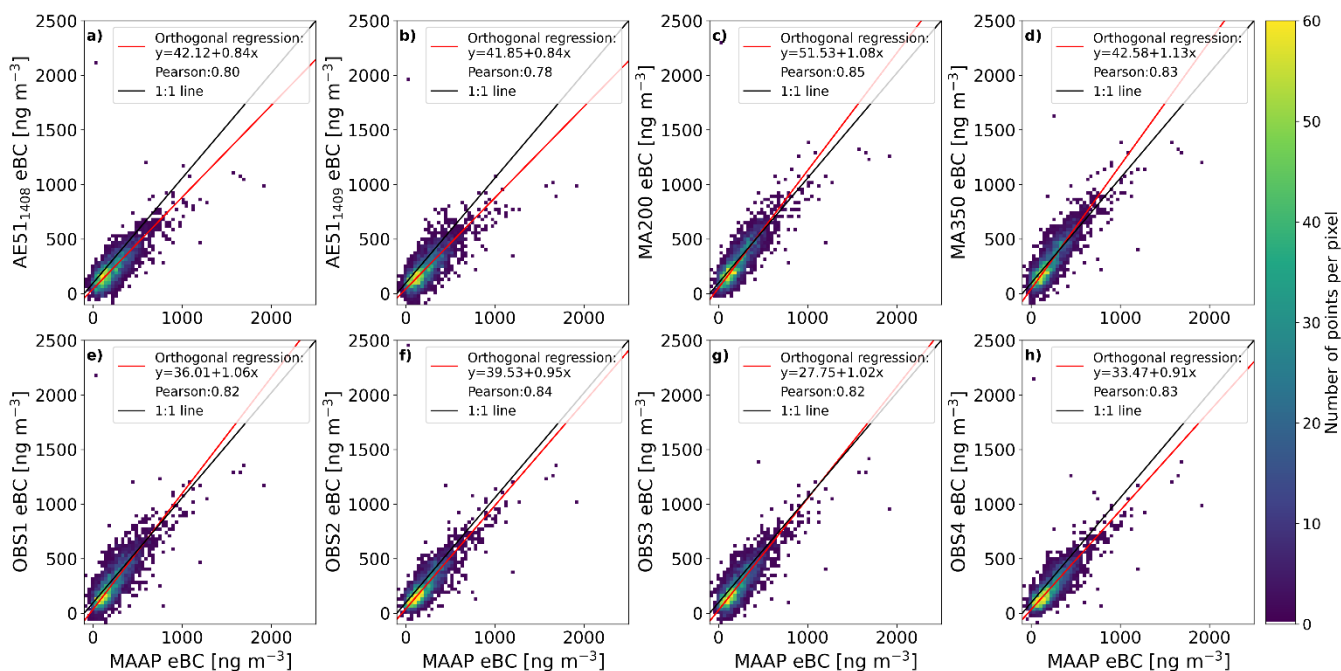

**Figure 3.** Scatter density plot of the correlation between the sensors and the reference instrument MAAP. Data are from 1<sup>st</sup> intercomparisons 26.5. – 6.6.2022 as 5-minute averages.



265 **Table 3.** Correlation between the sensors and MAAP during the intercomparison measurements (5min, BC). Intercept and slope describe an orthogonal regression line fit.  $r$  is pearson correlation. Not Available (N.A.) is listed for the sensor data sets, which were not available due to instrument failures.

| Sensor               | 1 <sup>st</sup> intercomparison<br>26.5. – 6.6.2022 |       |      | 2 <sup>nd</sup> intercomparison<br>16.9. – 3.10.2022 |       |      | Both intercomparisons, if available |       |      |
|----------------------|-----------------------------------------------------|-------|------|------------------------------------------------------|-------|------|-------------------------------------|-------|------|
|                      | Intercept                                           | Slope | $r$  | Intercept                                            | Slope | $r$  | Intercept                           | Slope | $r$  |
| AE51 <sub>1408</sub> | 42.1                                                | 0.84  | 0.80 | 48.5                                                 | 0.78  | 0.94 | 49.8                                | 0.79  | 0.92 |
| AE51 <sub>1409</sub> | 41.9                                                | 0.84  | 0.78 | 55.6                                                 | 0.70  | 0.92 | 59.1                                | 0.71  | 0.90 |
| MA200 spot1          | 51.5                                                | 1.08  | 0.85 | 28.6                                                 | 0.90  | 0.92 | 53.6                                | 0.90  | 0.90 |
| MA350 spot1          | 42.6                                                | 1.13  | 0.83 | N.A.                                                 | N.A.  | N.A. | N.A.                                | N.A.  | N.A. |
| OBS1                 | 36.0                                                | 1.06  | 0.82 | N.A.                                                 | N.A.  | N.A. | N.A.                                | N.A.  | N.A. |
| OBS2                 | 39.5                                                | 0.95  | 0.84 | N.A.                                                 | N.A.  | N.A. | N.A.                                | N.A.  | N.A. |
| OBS3                 | 27.8                                                | 1.02  | 0.82 | 28.6                                                 | 0.77  | 0.91 | 47.5                                | 0.79  | 0.88 |
| OBS4                 | 33.5                                                | 0.91  | 0.83 | 37.9                                                 | 0.72  | 0.94 | 50.6                                | 0.73  | 0.91 |

### 3.1.1 Applicability of the dualspot correction

270 Dualspot correction, that compensates for the loading effect, was tested during the intercomparison periods. The performance of the correction can be seen in Fig 4, where the sensor data and dualspot corrected data are compared to the reference instrument MAAP. MA200 and MA350 have the dualspot correction inbuilt to the sensor design and the sensor applies the correction automatically. For MA200 the correction reduced the quality of the data by increasing the difference to the reference MAAP from 21 to 48 ng m<sup>-3</sup>. Most notably the variation of the differences increased, reducing the precision (seen as larger range of whiskers in Fig. 4) of the result. For MA350 the correction improved the difference from 69 to -22  
 275 ng m<sup>-3</sup>. The precision was reduced, but not as much as for the MA200. The inverse in the compensation seems to arise from the relative differences of spot 1 and spot 2. The  $k$  value was observed to be highly variable and regularly beyond reasonable values for both sensors. The AE51 and Observair sensors were paired, and the correction was applied manually by post-processing. For the AE51 the difference improved from -22 to 5 ng m<sup>-3</sup>, and the precision remained relatively constant. The correction worked by increasing concentrations at high attenuations and increasing the accuracy of the measurement. For the  
 280 Observair pairings the correction increased the difference to the reference for OBS1&2 and maintained for OBS3&4. For both pairings the correction reduced the precision of the measurement.

Due to the reduction of the precision in most (4/5) cases, it was decided that the correction is not implemented during the deployment and spot 1 data are used with MA-series sensors. Instead, a simple calibration was used to improve accuracy of the sensors in relation to the reference instrument MAAP.



285

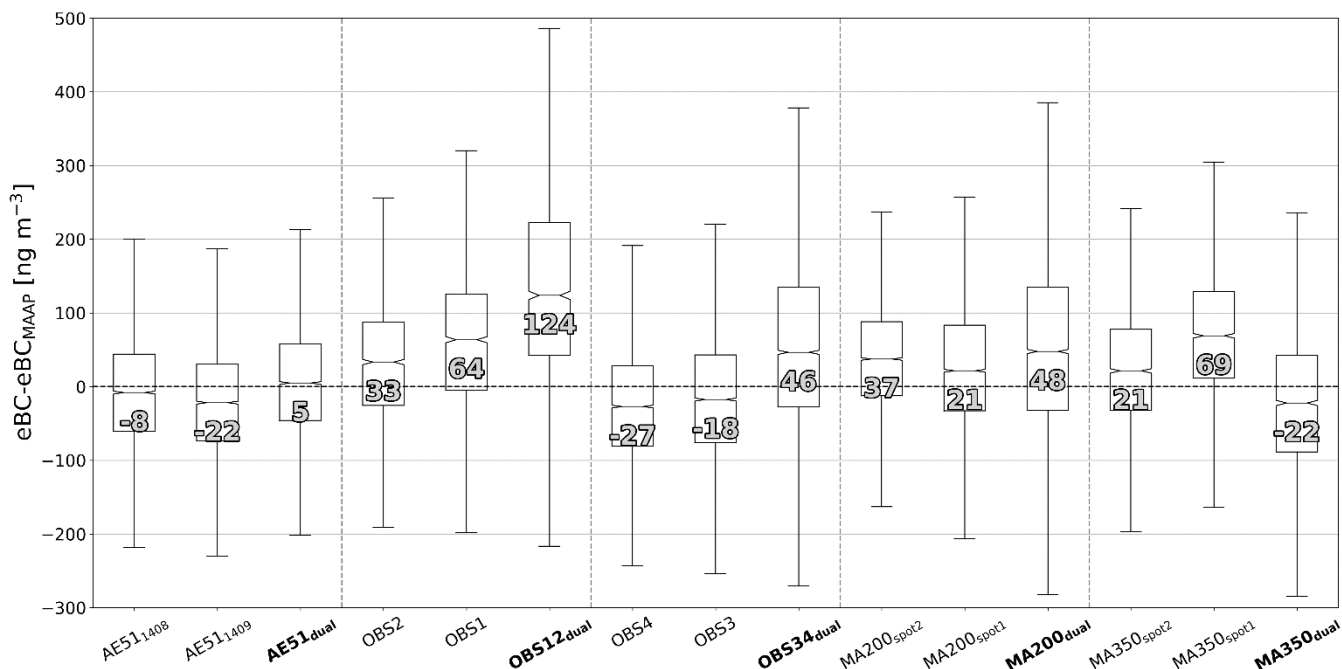

**Figure 4.** The effect of the dualspot correction during the intercomparison periods. Data are from both intercomparison periods in 5-minute averages. In the plot the middle line shows the median, “+” shows mean, top of box 75th percentile, bottom of the box 25th percentile and top and bottom whisker the last points within 1.5 times the interquartile range.

### 290 3.1.2 Sensor calibration

To improve the accuracy and comparability of the sensor types, simple calibrations were applied to the data. Two calibrations were tested: F factor and orthogonal regression line fit. The F factor calibration was applied by calculating a relation of sensor *eBC* mean to reference instrument MAAP *eBC* mean with data from the 1<sup>st</sup> intercomparison period. The respective sensor data were then multiplied by the reciprocal of the relation. The orthogonal fit calibrations were calculated by applying the sensor respective equations seen in Fig. 3 and Table 4 to the data. The results of the calibrations can be seen in Fig. 5.

The F factor calibration reduced the spread of the data most aggressively. The medians agreed after the calibration within one standard error of the reference instrument (notches overlap). The orthogonal fit performed near equal to the F factor calibration. For the MA-series the orthogonal calibration overcompensated slightly, but for the Observair sensors this method performed better. After the calibration mean and median values are within  $\pm 5 \text{ ng m}^{-3}$  for the Observair sensors,  $\pm 8 \text{ ng m}^{-3}$  for the MA-series and  $\pm 18 \text{ ng m}^{-3}$  for the AE51s. All sensor medians were within one standard error of the reference (MAAP) after calibration. In Fig. 6 the correlation between the calibrated data and MAAP can be seen. The new orthogonal line fit intercepts and slopes are within  $\pm 4 \text{ ng m}^{-3}$  and  $\pm 0.05$  respectively.



305 The orthogonal regression fit was selected as it considers variation of the sensors and the reference. The whole data set were calibrated according to the orthogonal fit equations determined from the 1<sup>st</sup> intercomparison. During the analysis this calibration step was observed to be imperative as otherwise differences between instruments could be incorrectly construed as spatio-temporal differences between the locations in the deployment phase.

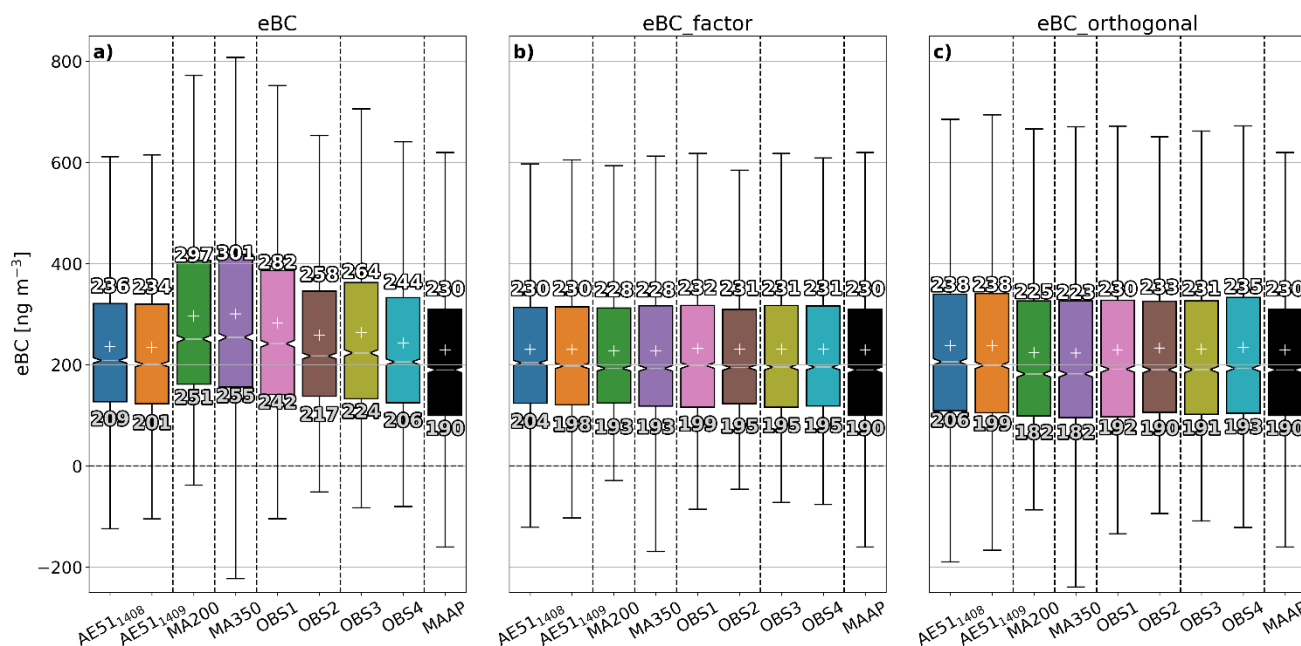

310 **Figure 5. Calibration methods.** Panel a) is data without calibration. Panel b) is data calibrated by an F factor calculated by comparing 1<sup>st</sup> intercomparison data means. Panel c) is data calibrated with the orthogonal fit equations. In the plot the middle line shows the median, “+” shows mean, top of box 75th percentile, bottom of the box 25th percentile and top and bottom whisker the last points within 1.5 times the interquartile range.

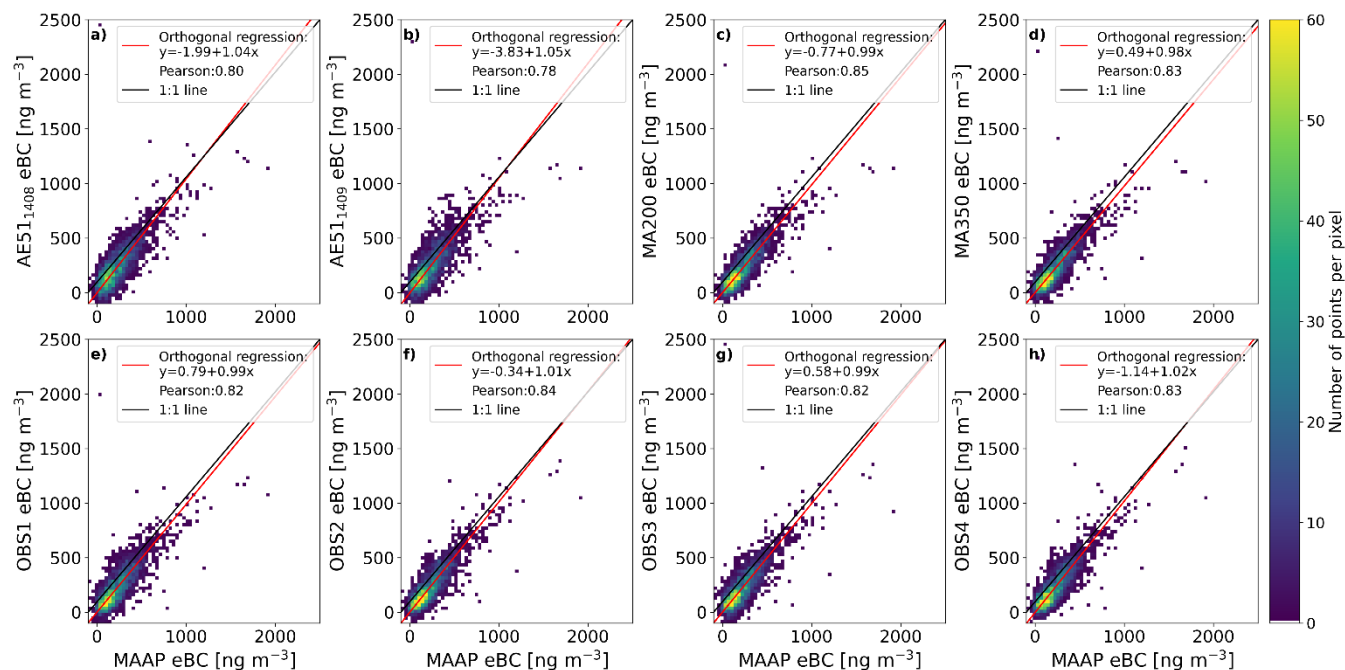

315 **Figure 6.** Correlation and line fits after calibrating with the orthogonal regression equations seen in Fig. 3.

**Table 4.** Table of the effects of the calibration with the orthogonal regression.

| Sensor               | Intercomparison 1 26.5-6.6.2022 |       |      | Intercomparison 1 26.5-6.6.2022 after calibration |       |      |
|----------------------|---------------------------------|-------|------|---------------------------------------------------|-------|------|
|                      | Intercept                       | Slope | r    | Intercept                                         | Slope | r    |
| AE51 <sub>1408</sub> | 42.1                            | 0.84  | 0.80 | -1.99                                             | 1.04  | 0.80 |
| AE51 <sub>1409</sub> | 41.9                            | 0.84  | 0.78 | -3.83                                             | 1.05  | 0.78 |
| MA200 spot1          | 51.5                            | 1.08  | 0.85 | -0.77                                             | 0.99  | 0.85 |
| MA350 spot1          | 42.6                            | 1.13  | 0.83 | 0.49                                              | 0.98  | 0.83 |
| OBS1                 | 36.0                            | 1.06  | 0.82 | 0.79                                              | 0.99  | 0.82 |
| OBS2                 | 39.5                            | 0.95  | 0.84 | -0.34                                             | 1.01  | 0.84 |
| OBS3                 | 27.8                            | 1.02  | 0.82 | 0.58                                              | 0.99  | 0.82 |
| OBS4                 | 33.5                            | 0.91  | 0.83 | -1.14                                             | 1.02  | 0.83 |



### 3.2 Deployment period

The sensors were deployed to the Kumpula campus area between 4.7. – 16.9.2022 (74 d). The sensor locations and descriptions can be seen in Fig. 1 and Table 1. Timeseries and a boxplot of the whole deployment can be seen in Figs. 7 and 8. In the boxplots one sensor per location is shown as the differences between location specific sensor pairings were not statistically significant. MA350 was only able to measure the first two weeks between 4.7. – 19.7.2022 (15 d) after which the inlet of the sensor got blocked and the sensor pump suffered damage causing the data to be unusable.

#### 3.2.1 General features of BC in Kumpula

The two-week period is marked in Fig. 7, and comparison between the locations during this period can be seen in the left panel of Fig. 8. The  $F_{\text{roof}}$  and  $F_{\text{ground}}$  locations had the lowest concentrations and the highest concentrations of  $eBC$  were measured at  $P_{\text{roof}}$  and  $P_{\text{ground}}$ , respectively. At  $P_{\text{roof}}$  and  $P_{\text{ground}}$  multiple short-term high-concentration peaks were observed possibly caused by the proximity of the bus stop. The bus stop has approximately 160 buses per day with the peak between 7-17 having 9 to 12 buses per hour.  $BG_{\text{ground}}$  showed similar median concentration to the  $P_{\text{roof}}$  and  $P_{\text{ground}}$  locations, but without the local source peaks that were most likely caused by traffic next to  $P_{\text{roof}}$  and  $P_{\text{ground}}$ . At  $SMEARIII_{\text{ground}}$ , we observed slightly higher concentrations than at the closest site  $F_{\text{ground}}$  but lower than the  $P_{\text{roof}}$  and  $P_{\text{ground}}$  locations. The local source peaks for MAAP at  $SMEARIII_{\text{ground}}$  were in between the magnitudes of the respective  $F_{\text{roof}}$  and  $F_{\text{ground}}$  to  $P_{\text{roof}}$  and  $P_{\text{ground}}$  values. The construction site was not observed to be a major source of BC as the sensors  $F_{\text{roof}}$  and  $F_{\text{ground}}$  closest to the cite measured the lowest concentrations. The effect of the construction site was also not observed in wind analysis (see Sect. 3.2.4). The large variation in data at  $P_{\text{ground}}$  and  $F_{\text{roof}}$  (MA200 and MA350, respectively) are due to temperature effects affecting the measurement results (see Sect. 3.2.5).

Minimal vertical difference was observed between the  $P_{\text{roof}}$  and  $P_{\text{ground}}$  and their median values were within one standard error. Similarly, at  $F_{\text{roof}}$  and  $F_{\text{ground}}$ , respectively, minimal vertical difference was observed.

In the right panel of Fig. 8, when considering the whole deployment period, two distinct areas could be identified. The locations closer to the Kustaa Vaasa road of  $P_{\text{roof}}$  and  $P_{\text{ground}}$  and the further away backgrounds of  $F_{\text{ground}}$ ,  $SMEARIII_{\text{ground}}$  and  $BG_{\text{ground}}$ . The difference between the areas is perhaps traffic proximity due to the Kustaa Vaasa road and bus traffic past the  $P_{\text{roof}}$  and  $P_{\text{ground}}$  locations. This causes  $P_{\text{roof}}$  and  $P_{\text{ground}}$  to measure approximately  $50 \text{ ng m}^{-3}$  higher concentrations. The difference is relatively negligible as the instrument precisions are in the same magnitudes and the ambient conditions are challenging for the sensors.

345

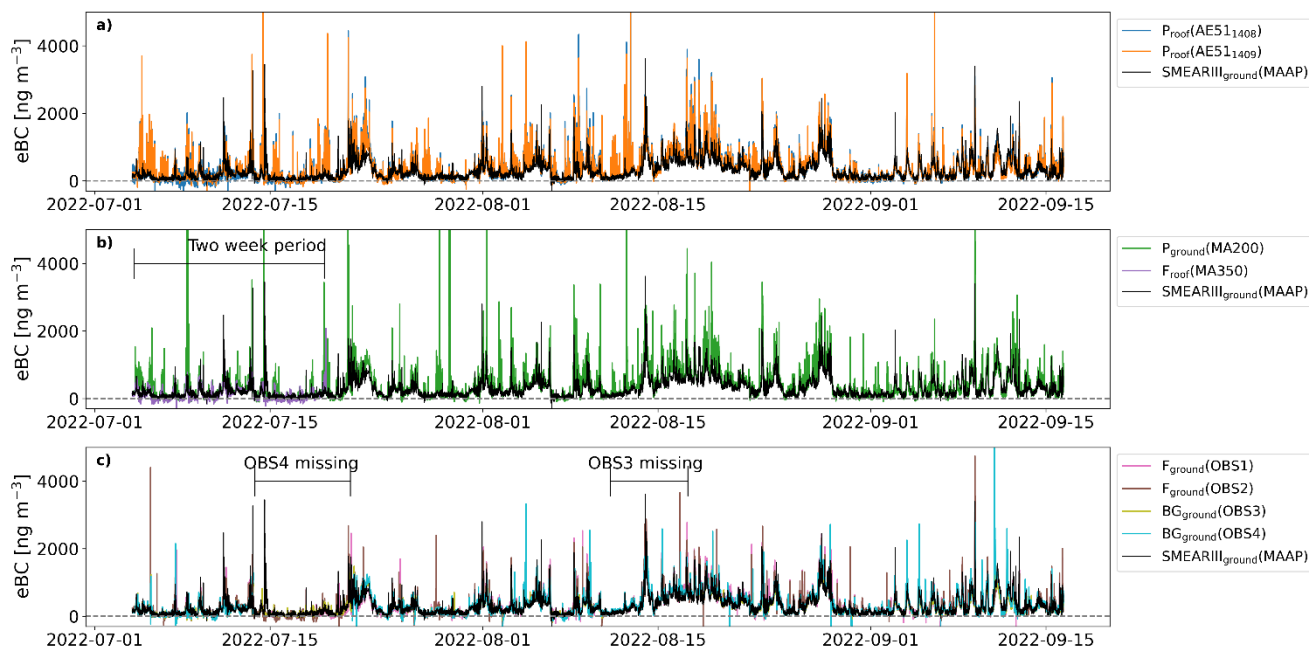

**Figure 7.** Timeseries of *eBC* for the deployment period 4.7-16.9.2022.

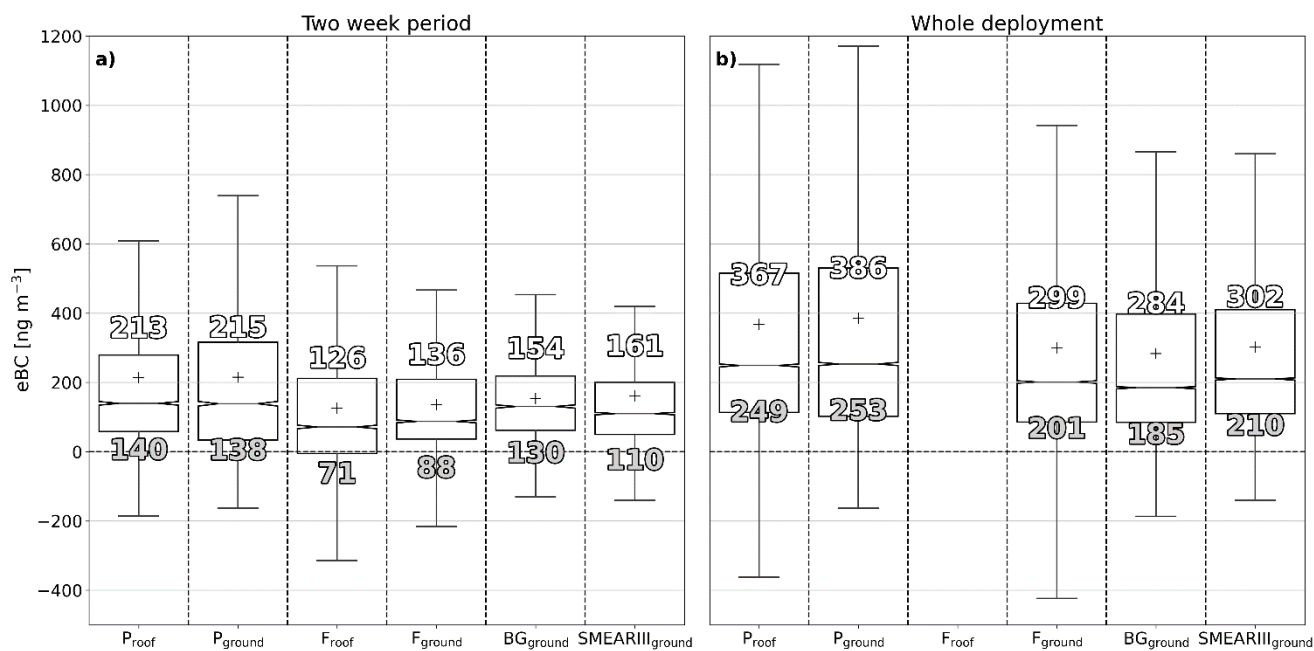

**Figure 8.** Boxplot of the whole deployment period. Panel a) data are only from the first 15.5 days (4.7-19.7) of the deployment. Panel b) data are from the whole deployment phase 4.7. – 16.9.2022 (74 d). In the plot the middle line shows the median, “+” shows mean, top of box 75th percentile, bottom of the box 25th percentile and top and bottom whisker the last points within 1.5 times the interquartile range.

350



### 3.2.2 Daily features in BC concentration

A daily breakdown can be seen in Fig. 9. There is somewhat surprising variation on day-to-day basis, as no notable differences are expected between weekdays. At all the locations, Mon and Tue had higher concentrations than Wed and Thu. And at most sites the highest concentrations were observed on Fri. Weekend and weekdays do not seem to have a clear difference in the medians to each other, which is differing compared to other studies that observed lower *eBC* concentrations during weekends at traffic and urban background sites in Helsinki (Helin et al., 2018; Luoma, Niemi, et al., 2021). Variation might be due to a rather short period (74 d) for such an analysis and the summertime which is a vacation season in Finland.

$P_{\text{roof}}$  (AE51) filters were most commonly changed Mon and Fri and  $F_{\text{ground}}$  and  $BG_{\text{ground}}$  (Observairs) Mon-Wed with only exception Friday 19.8. With the single filter instruments the significant loading effects should be considered as a pattern of data collection behavior could implicate false patterns of *eBC* in the daily variability. However, a rather similar day-to-day pattern is observed at all the different sites, even at  $SMEAR_{\text{IIIground}}$  and  $P_{\text{ground}}$ , where the filter was changed automatically at random periods. Therefore, we can conclude that the weekday variation seen in the *eBC* concentrations was not remarkably influenced by the filter changing cycles.

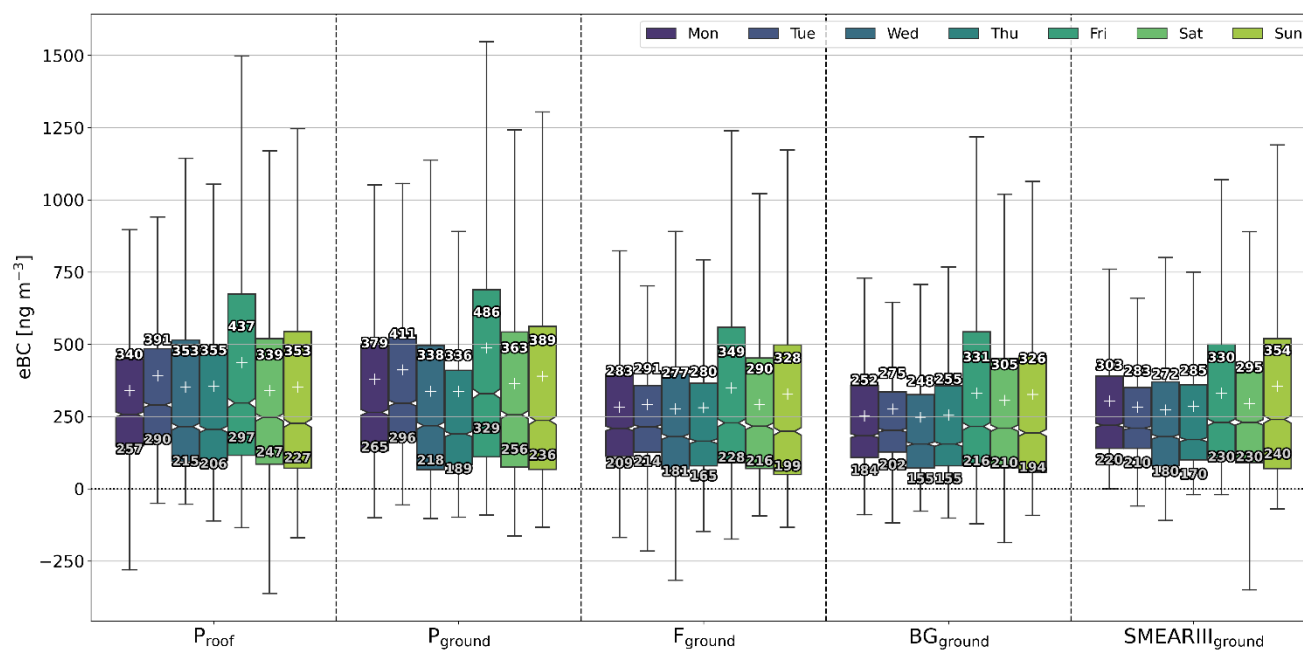

365

**Figure 9.** Daily *eBC* concentrations for different sensors. In the boxplot every sensor has 7 boxes going left to right as Mon-Sun (indicated with different colors). Data are calibrated and in 5-minute averages. In the plot the middle line shows the median, “+” shows mean, top of box 75th percentile, bottom of the box 25th percentile and top and bottom whisker the last points within 1.5 times the interquartile range.



### 3.2.3 Hourly variation of BC concentrations

370 An hourly variation of  $eBC$  can be seen in Fig. 10, which shows a rather similar diurnal pattern at all the locations. The hourly average  $eBC$  concentrations sharply rose between 7-10 due to the morning traffic.  $eBC$  reached the highest concentrations at 9-10 after which the concentrations decreased assumably due to smaller traffic rates and more efficient dilution by the convective boundary layer. The afternoon rush hour around 16 was only visible as a small bump in the data. A clearer rise in concentration was observed late in the evening around 21-23. This increase was much less compared to the morning peak seen in  $eBC$ . The increased  $eBC$  levels at night are probably caused by accumulation of pollutants in a more stable atmosphere. Also, local wood combustion emissions, for example, evening activities at the close by community garden, can increase the  $eBC$  levels. Similar diurnal patterns have been observed by previous studies during the warm period at traffic and urban background sites (Backman et al., 2012; Luoma, Niemi, et al., 2021; Sahu et al., 2011).

375

380

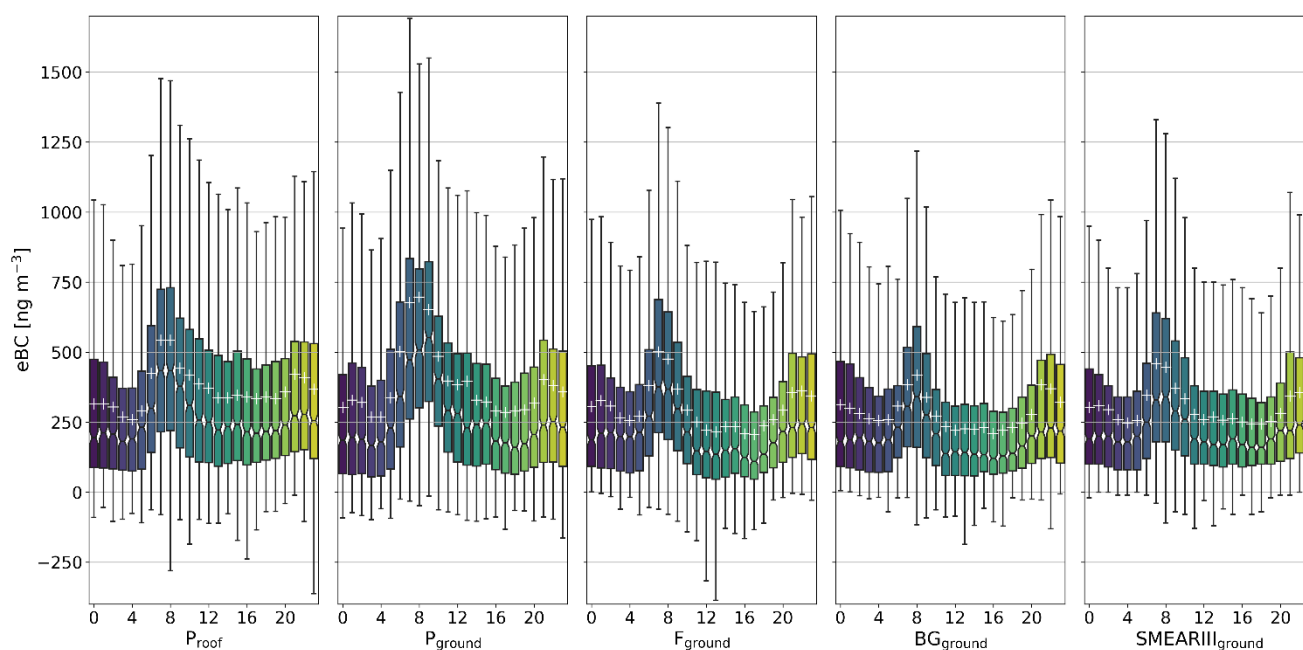

380 **Figure 10.** Hourly variation of  $eBC$  concentrations. In the boxplot every sensor has 24 boxes going from 00-23 where the box describes the hour of the day. In the plot the middle line shows the median, “+” shows mean, top of box 75th percentile, bottom of the box 25th percentile and top and bottom whisker the last points within 1.5 times the interquartile range.

### 3.2.4 Wind

Local sources of the BC were studied with a wind rose analysis shown in Fig. 11. The wind roses for different locations mostly tell a similar story: highest  $eBC$  concentrations were measured with low wind speeds especially blowing from the east, when the  $eBC$  was transported to the campus area from the busy road (Kustaa Vaasan tie). The low wind speeds were also tied to the evening times with the accumulation of pollutants due to the more stable atmosphere.

385



The effect of the nearby construction site was not clearly visible in the data. Only at the  $P_{\text{ground}}$  and  $P_{\text{roof}}$  locations there were some increased concentrations from the direction of the construction (south-west) site. For  $\text{SMEARIII}_{\text{ground}}$  or  $F_{\text{ground}}$ , the direction of the construction site (north-east) did not stand out. At  $\text{SMEARIII}_{\text{ground}}$ , increased concentrations on higher wind speeds from west observed, which is probably caused by a single pollution event.

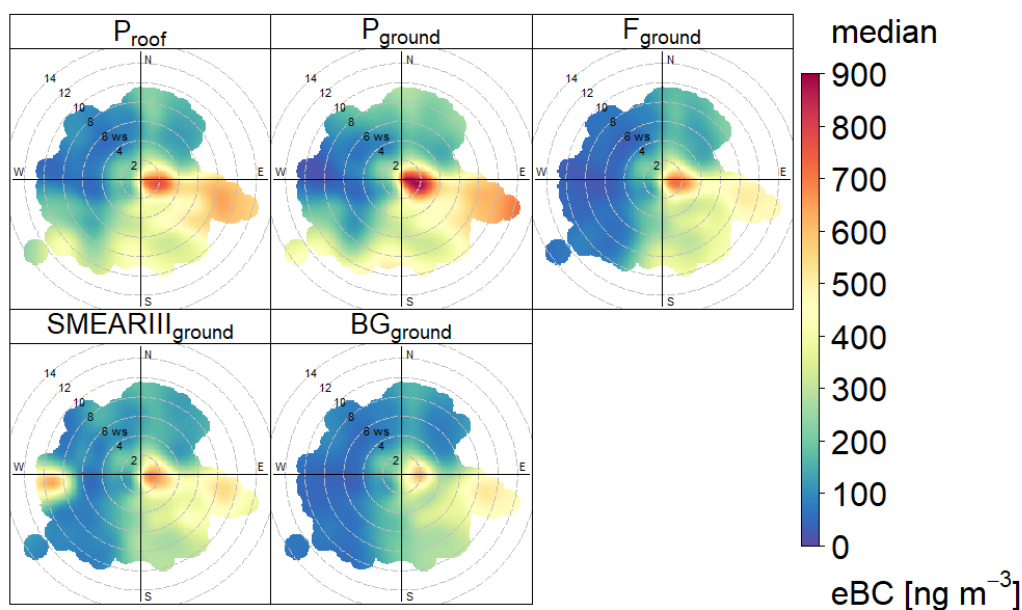

**Figure 11.** Wind roses of the deployment phase showing median BC concentration measured with different sensors as function wind speed and direction.

### 395 3.2.5 Sensor overheating artifacts

During the measurements overheating of sensors was observed in all locations utilizing the weatherproof boxes ( $P_{\text{ground}}$ ,  $F_{\text{roof}}$ ,  $F_{\text{ground}}$ ,  $\text{BG}_{\text{ground}}$ ). This was due to the increase of ambient temperature after sunrise and in some locations direct sunlight heating the black weatherproof boxes.

With the MA-series sensors (MA200, MA350) the change of the temperature and RH caused clearly erroneous data as seen in Fig. 12. Previous studies have shown that sharp changes in temperature and RH can cause positive or negative spikes in the measurement of filter-based optical methods (Caubel et al., 2018; Düsing et al., 2019). The reason for this artifact is considered to be mostly influenced by the detector, LED properties and other electronics affected by the temperature change and sorption and desorption of the filter fibers due to changing RH. **The largest deviation coincides when the temperature change was the fastest around 9-11 in the morning.** The dualspot correction was observed to amplify the measurement error of the individual spots.



For the Observair sensors ( $F_{\text{ground}}$  and  $BG_{\text{ground}}$ ) the influence of overheating was negligible when compared to  $SMEARIII_{\text{ground}}$ , due to the automatic environmental compensation algorithm used in the sensors described by Caubel et al. (2018).

The large overall change in temperature most likely caused significant strain on the pumps reducing the lifetime of the sensors. **This may have contributed to the failure of the MA350 sensor pump during deployment.** With AE51, at the  $P_{\text{roof}}$ , no problems related to temperature and RH were observed due to the deployment location being inside in a controlled laboratory space, but similar behavior could be expected if these sensors are deployed in ambient conditions.

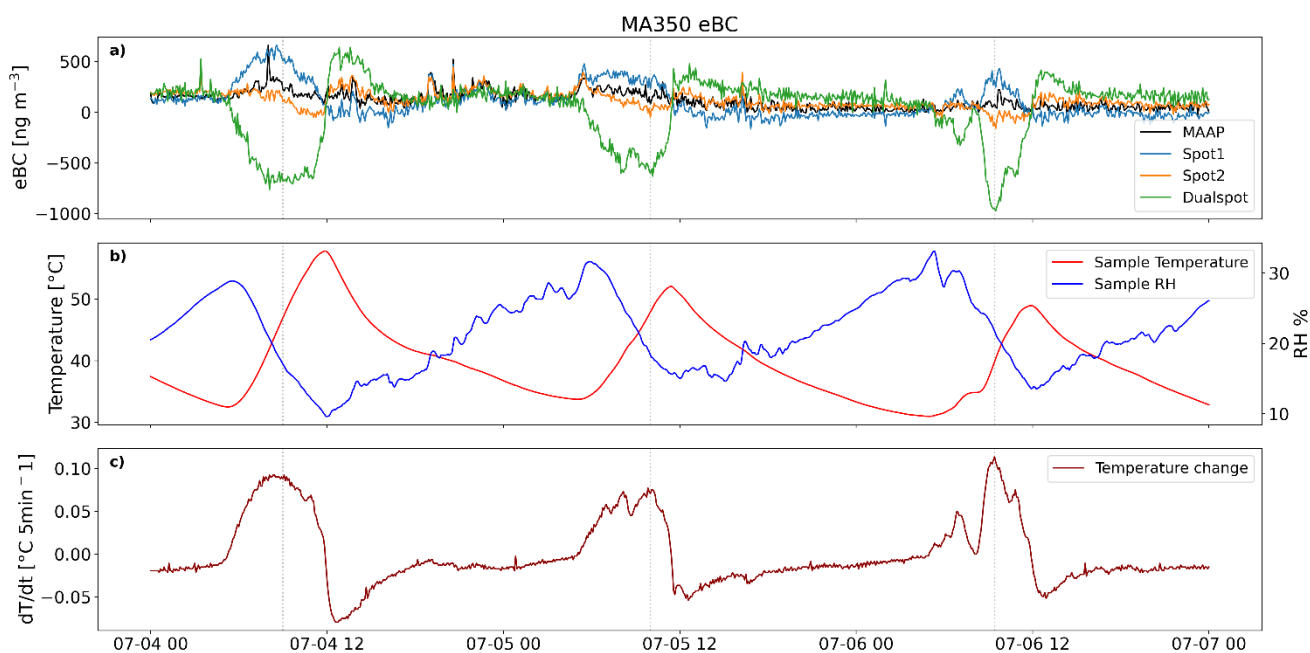

415 **Figure 12.** MA350 temperature/RH artifact. Panels are; a) time series of eBC, b) temperature (°C) and relative humidity (%), and c) the temperature change in (°C 5 min<sup>-1</sup>).

#### 4 Conclusions

In this study, four different types eBC sensors were used as a sensor network to firstly study variation of eBC in urban environment and secondly to study applicability of eBC sensors to monitor ambient BC concentrations in real conditions. The results were compared to reference level instrument (MAAP) results to validate the results.

420 Due to their small size enabling easy installation to existing structures (like sheds or roofs) and affordability the sensors were observed to be well suited to building a sensor network at densely populated urban area. The BC measurements have been conducted since 1970s and thus the used measurement techniques are relatively mature and well known, which helps in the data interpretation significantly. However, still in the field study, several issues were observed. The performance of the



425 dualspot correction should be evaluated before field campaigns for small scale sensors. Due to the small size and much lower  
flow rates the sensors show significant instability in the determination of the correction parameter  $k$ . In this study during the  
intercomparison measurements the dualspot correction was unstable in temperature and RH controlled environment. During  
deployment measurements changes in temperature caused additional errors in the measurements of the individual spots which  
were amplified by the dualspot correction. This effect is especially important with sensors like the MA200 and MA350,  
which by default give the measurement result as the dualspot corrected data.

430 Temperature changes significantly affected the measurements and provided a challenge in the deployment of the sensor  
network. Development of robust enclosures or deployment in locations that have stable or controlled temperature is needed.  
Alternatively, the environmental compensation developed by DST was observed to reduce the effect of changes in  
temperature. Due to the unfortunate circumstances of DSTs untimely cease of operations a suggestion is made that the  
environmental compensation outlined in Caubel, Cados and Kirchstetter (2018) could be applied to measurement data via  
435 post-processing or implemented to other sensors by manufacturers as a solution to the temperature artifacts.

The wind analysis shows the potential of a dense sensor network utilized in source-apportionment of BC in urban areas. This  
allows the identification of major sources of combustion-based particles or areas and times where the particles are especially  
prevalent. This information can be used in the urban planning, emission regulations, policy making and emission mitigation  
for such areas to reduce adverse impacts of BC.

440 *Code availability*

Gitlab: <https://version.helsinki.fi/elomaata/UAQ2-0>

*Data availability*

Gitlab: <https://version.helsinki.fi/elomaata/UAQ2-0>

*Author contributions*

445 TE did the data analysis and main part of the writing with the help by KL. TE and SH were the main responsible people to  
build the sensor network and keep it running. All the authors contributed to the planning of the study, interpreting the data,  
and commenting the manuscript. HT and TP supervised the work and organized the funding.

*Competing interests*

At least one of the (co-)authors is a member of the editorial board of Aerosol Research.

450



### Acknowledgements

Financial support from Urban Air Quality 2.0 project funded by Technology Industries of Finland Centennial Foundation, H2020 project RI-URBANS (Grant agreement No 101036245), the Academy of Finland via the project Black and Brown  
 455 Carbon in the Atmosphere and the Cryosphere (BBrCAC) (decision nr. 341271) and Academy of Finland Flagship funding (grant no. 337552, 337549) are gratefully acknowledged

### A1. Supplemental material

The sensor flow rates were calibrated before the measurements (on 25.5.) with a Alicat Scientific M-series mass flow meter. The calibration was done manually according to the operating manuals for the AE51s and Observairs and the automatic flow  
 460 calibration program was used for the MA-series sensors. For OBS1 the flow calibration was  $\pm 2$  ml/min and for the other AE51 and OBS sensors  $\pm 1$  ml/min. The MA-sensors passed the automatic calibration program. OBS1 and 2 flows were checked after the 1<sup>st</sup> intercomparison. MA350 was flow calibrated on 9.8. All OBS flows were calibrated on 19.8 and results were within  $\pm 1$  ml/min. On 30.8 all sensors were flow calibrated. AE51s were within  $\pm 1$  ml/min and OBSs were within  $\pm 2$  ml/min. MA200 flow calibration failed, and the flow given by the instrument in relation to the flow meter was +4 ml/min.  
 465 Also, during the calibration AE51<sub>1408</sub> couldn't reach the maximum flow of the pump of 250 ml/min therefore showing fatigue and deterioration of the pump. The results of flow calibrations are collected to Table A1.

**Table A1.** Flow calibrations during the measurements

| Sensor               | 25.5           | 6.6 | 9.8 | 19.8 | 30.8                                          |
|----------------------|----------------|-----|-----|------|-----------------------------------------------|
| AE51 <sub>1408</sub> | $\pm 1$ ml/min |     |     |      | $\pm 1$ ml/min, couldn't reach max 250 ml/min |
| AE51 <sub>1409</sub> | $\pm 1$ ml/min |     |     |      | $\pm 1$ ml/min                                |
| MA200                | passed         |     |     |      | Failed, +4 ml/min                             |



|       |           |         |                                                                  |                                                        |                                |
|-------|-----------|---------|------------------------------------------------------------------|--------------------------------------------------------|--------------------------------|
| MA350 | passed    |         | passed, was blocked before from 22.7., irregularities from 19.7. | blocked after data loading, tube was loose fixed 30.8. | Tube fixed no flow adjustments |
| OBS1  | ±2 ml/min | checked |                                                                  | ±1 ml/min                                              | ±2 ml/min                      |
| OBS2  | ±1 ml/min | checked |                                                                  | ±1 ml/min                                              | ±2 ml/min                      |
| OBS3  | ±1 ml/min |         |                                                                  | ±1 ml/min                                              | ±2 ml/min                      |
| OBS4  | ±1 ml/min |         |                                                                  | ±1 ml/min                                              | ±2 ml/min                      |



## 470 References

- Arnott, W. P., Hamasha, K., Moosmüller, H., Sheridan, P. J., & Ogren, J. A. (2005). Towards Aerosol Light-Absorption Measurements with a 7-Wavelength Aethalometer: Evaluation with a Photoacoustic Instrument and 3-Wavelength Nephelometer. *Aerosol Science and Technology*, 39(1), 17–29. <https://doi.org/10.1080/027868290901972>
- Backman, J., Rizzo, L. V., Hakala, J., Nieminen, T., Manninen, H. E., Morais, F., Aalto, P. P., Siivola, E., Carbone, S., Hillamo, R., Artaxo, P., Virkkula, A., Petäjä, T., & Kulmala, M. (2012). On the diurnal cycle of urban aerosols, black carbon and the occurrence of new particle formation events in springtime São Paulo, Brazil. *Atmospheric Chemistry and Physics*, 12(23). <https://doi.org/10.5194/acp-12-11733-2012>
- Backman, J., Schmeisser, L., Virkkula, A., Ogren, J. A., Asmi, E., Starkweather, S., Sharma, S., Eleftheriadis, K., Uttal, T., Jefferson, A., Bergin, M., Makshtas, A., Tunved, P., & Fiebig, M. (2017). On Aethalometer measurement uncertainties and an instrument correction factor for the Arctic. *Atmospheric Measurement Techniques*, 10(12), 5039–5062. <https://doi.org/10.5194/amt-10-5039-2017>
- Bernardoni, V., Ferrero, L., Bolzacchini, E., Forello, A. C., Gregorič, A., Massabò, D., Močnik, G., Prati, P., Rigler, M., Santagostini, L., Soldan, F., Valentini, S., Valli, G., & Vecchi, R. (2021). Determination of Aethalometer multiple-scattering enhancement parameters and impact on source apportionment during the winter 2017/18 EMEP/ACTRIS/COLOSSAL campaign in Milan. *Atmospheric Measurement Techniques*, 14(4), 2919–2940. <https://doi.org/10.5194/amt-14-2919-2021>
- Bond, T. C., Anderson, T. L., & Campbell, D. (1999). Calibration and Intercomparison of Filter-Based Measurements of Visible Light Absorption by Aerosols. *Aerosol Science and Technology*, 30(6), 582–600. <https://doi.org/10.1080/027868299304435>
- Bond, T. C., & Bergstrom, R. W. (2006). Light Absorption by Carbonaceous Particles: An Investigative Review. *Aerosol Science and Technology*, 40(1), 27–67. <https://doi.org/10.1080/02786820500421521>
- Bond, T. C., Doherty, S. J., Fahey, D. W., Forster, P. M., Berntsen, T., DeAngelo, B. J., Flanner, M. G., Ghan, S., Kärcher, B., Koch, D., Kinne, S., Kondo, Y., Quinn, P. K., Sarofim, M. C., Schultz, M. G., Schulz, M., Venkataraman, C., Zhang, H., Zhang, S., ... Zender, C. S. (2013). Bounding the role of black carbon in the climate system: A scientific assessment. *Journal of Geophysical Research: Atmospheres*, 118(11), 5380–5552. <https://doi.org/https://doi.org/10.1002/jgrd.50171>
- Caubel, J. J., Cados, T. E., & Kirchstetter, T. W. (2018). A new black carbon sensor for dense air quality monitoring networks. *Sensors (Switzerland)*, 18(3). <https://doi.org/10.3390/s18030738>
- Caubel, J. J., Cados, T. E., Preble, C. V., & Kirchstetter, T. W. (2019). A Distributed Network of 100 Black Carbon Sensors for 100 Days of Air Quality Monitoring in West Oakland, California. *Environmental Science and Technology*, 53(13). <https://doi.org/10.1021/acs.est.9b00282>



- Chakraborty, M., Giang, A., & Zimmerman, N. (2023). Performance evaluation of portable dual-spot micro-aethalometers for source identification of black carbon aerosols: Application to wildfire smoke and traffic emissions in the Pacific Northwest. *Atmospheric Measurement Techniques*, 16(9). <https://doi.org/10.5194/amt-16-2333-2023>
- 505 Collaud Coen, M., Weingartner, E., Apituley, A., Ceburnis, D., Fierz-Schmidhauser, R., Flentje, H., Henzing, J. S., Jennings, S. G., Moerman, M., Petzold, A., Schmid, O., & Baltensperger, U. (2010). Minimizing light absorption measurement artifacts of the Aethalometer: evaluation of five correction algorithms. *Atmospheric Measurement Techniques*, 3(2), 457–474. <https://doi.org/10.5194/amt-3-457-2010>
- Delgado-Saborit, J. M. (2012). Use of real-time sensors to characterise human exposures to combustion related pollutants. *Journal of Environmental Monitoring*, 14(7). <https://doi.org/10.1039/c2em10996d>
- 510 Di Biagio, C., Formenti, P., Cazaunau, M., Pangui, E., Marchand, N., & Doussin, J.-F. (2017). Aethalometer multiple scattering correction C<sub>ref</sub> for mineral dust aerosols. *Atmospheric Measurement Techniques*, 10(8), 2923–2939. <https://doi.org/10.5194/amt-10-2923-2017>
- Distributed Sensing Technologies. (2023). *Observair Operating Manual*. [https://www.dstech.io/\\_files/ugd/18a7e0\\_86bdb3ebd54a49aaaa64e075e1e69604.pdf](https://www.dstech.io/_files/ugd/18a7e0_86bdb3ebd54a49aaaa64e075e1e69604.pdf)
- 515 Drinovec, L., Močnik, G., Zotter, P., Prévôt, A. S. H., Ruckstuhl, C., Coz, E., Rupakheti, M., Sciare, J., Müller, T., Wiedensohler, A., & Hansen, A. D. A. (2015). The “dual-spot” Aethalometer: an improved measurement of aerosol black carbon with real-time loading compensation. *Atmospheric Measurement Techniques*, 8(5), 1965–1979. <https://doi.org/10.5194/amt-8-1965-2015>
- 520 Düsing, S., Wehner, B., Müller, T., Stöcker, A., & Wiedensohler, A. (2019). The effect of rapid relative humidity changes on fast filter-based aerosol-particle light-absorption measurements: uncertainties and correction schemes. *Atmospheric Measurement Techniques*, 12(11), 5879–5895. <https://doi.org/10.5194/amt-12-5879-2019>
- Enroth, J., Saarikoski, S., Niemi, J., Kousa, A., Ježek, I., Močnik, G., Carbone, S., Kuuluvainen, H., Rönkkö, T., Hillamo, R., & Pirjola, L. (2016). Chemical and physical characterization of traffic particles in four different highway environments in the Helsinki metropolitan area. *Atmospheric Chemistry and Physics*, 16(9). <https://doi.org/10.5194/acp-16-5497-2016>
- 525 Hansen, A. D. A., Rosen, H., & Novakov, T. (1984). The aethalometer — An instrument for the real-time measurement of optical absorption by aerosol particles. *Science of The Total Environment*, 36, 191–196. [https://doi.org/https://doi.org/10.1016/0048-9697\(84\)90265-1](https://doi.org/https://doi.org/10.1016/0048-9697(84)90265-1)
- 530 Helin, A., Niemi, J. V., Virkkula, A., Pirjola, L., Teinilä, K., Backman, J., Aurela, M., Saarikoski, S., Rönkkö, T., Asmi, E., & Timonen, H. (2018). Characteristics and source apportionment of black carbon in the Helsinki metropolitan area, Finland. *Atmospheric Environment*, 190. <https://doi.org/10.1016/j.atmosenv.2018.07.022>
- Holder, A., Seay, B., Brashear, A., Yelverton, T., Blair, J., & Blair, S. (2018). Evaluation of a multi-wavelength black carbon (BC) sensor. *Clean Air Soc. Australia and New ZealandLidcomeA*, 770.



- 535 Hyvärinen, A.-P., Vakkari, V., Laakso, L., Hooda, R. K., Sharma, V. P., Panwar, T. S., Beukes, J. P., van Zyl, P. G., Josipovic, M., Garland, R. M., Andreae, M. O., Pöschl, U., & Petzold, A. (2013). Correction for a measurement artifact of the Multi-Angle Absorption Photometer (MAAP) at high black carbon mass concentration levels. *Atmospheric Measurement Techniques*, 6(1), 81–90. <https://doi.org/10.5194/amt-6-81-2013>
- Janssen, N. A. H., Hoek, G., Simic-Lawson, M., Fischer, P., van Bree, L., Brink, H. Ten, Keuken, M., Atkinson, R. W., Ross  
540 Anderson, H., Brunekreef, B., & Cassee, F. R. (2011). Black carbon as an additional indicator of the adverse health effects of airborne particles compared with pm10 and pm2.5. In *Environmental Health Perspectives* (Vol. 119, Issue 12). <https://doi.org/10.1289/ehp.1003369>
- Järvi, L., Hannuniemi, H., Hussein, T., Junninen, H., Aalto, P., Keronen, P., Kulmala, M., Keronen, P., Hillamo, R., Mäkelä,  
545 T., Siivola, E., & Vesala, T. (2009). The urban measurement station SMEAR III: Continuous monitoring of air pollution and surface-atmosphere interactions in Helsinki, Finland. *Boreal Environment Research*, 14, 1797–2469.
- Kamboures, M. A., Hu, S., Yu, Y., Sandoval, J., Rieger, P., Huang, S. M., Zhang, S., Dzhema, I., Huo, D., Ayala, A., & Chang, M. C. O. (2013). Black carbon emissions in gasoline vehicle exhaust: A measurement and instrument comparison. *Journal of the Air and Waste Management Association*, 63(8). <https://doi.org/10.1080/10962247.2013.787130>
- 550 [kartta.hel.fi](http://kartta.hel.fi). (2024). *Helsinki city road statistics*, Date accessed: 01/02/2024. [kartta.hel.fi](http://kartta.hel.fi)
- Kirchstetter, T., & Novakov, T. (2007). Controlled generation of black carbon particles from a diffusion flame and applications in evaluating black carbon measurement methods. *Atmospheric Environment*, 41, 1874–1888. <https://doi.org/10.1016/j.atmosenv.2006.10.067>
- Korhonen, S., Loukkola, K., Portin, H., & Niemi, J. V. (2022). Ilmanlaatu pääkaupunkiseudulla vuonna 2022. *HSY:N Julkaisuja 1/2023*. <https://julkaisu.hsy.fi/ilmanlaatu-paakaupunkiseudulla-vuonna-2022.html#cpMZzKjyQm>
- 555 Krzyzanowski, M., Kuna-Dibbert, B., & Schneider, J. (2005). *Health effects of transport-related air pollution*. WHO Regional Office Europe.
- Kuula, J., Friman, M., Helin, A., Niemi, J. V., Aurela, M., Timonen, H., & Saarikoski, S. (2020). Utilization of scattering and absorption-based particulate matter sensors in the environment impacted by residential wood combustion. *Journal of Aerosol Science*, 150. <https://doi.org/10.1016/j.jaerosci.2020.105671>
- 560 Lelieveld, J., Evans, J. S., Fnais, M., Giannadaki, D., & Pozzer, A. (2015). The contribution of outdoor air pollution sources to premature mortality on a global scale. *Nature*, 525(7569). <https://doi.org/10.1038/nature15371>
- Lequy, E., Siemiatycki, J., de Hoogh, K., Vienneau, D., Dupuy, J. F., Garès, V., Hertel, O., Christensen, J. H., Zhivin, S., Goldberg, M., Zins, M., & Jacquemin, B. (2021). Contribution of long-term exposure to outdoor black carbon to the  
565 carcinogenicity of air pollution: Evidence regarding risk of cancer in the gazel cohort. *Environmental Health Perspectives*, 129(3). <https://doi.org/10.1289/EHP8719>



- Li, B., Lei, X. ning, Xiu, G. li, Gao, C. yuan, Gao, S., & Qian, N. sheng. (2015). Personal exposure to black carbon during commuting in peak and off-peak hours in Shanghai. *Science of the Total Environment*, 524–525. <https://doi.org/10.1016/j.scitotenv.2015.03.088>
- 570 Liu, F., Yon, J., Fuentes, A., Lobo, P., Smallwood, G. J., & Corbin, J. C. (2020). Review of recent literature on the light absorption properties of black carbon: Refractive index, mass absorption cross section, and absorption function. *Aerosol Science and Technology*, 54(1), 33–51. <https://doi.org/10.1080/02786826.2019.1676878>
- Luoma, K., Niemi, J. V., Aurela, M., Lun Fung, P., Helin, A., Hussein, T., Kangas, L., Kousa, A., Rönkkö, T., Timonen, H., Virkkula, A., & Petäjä, T. (2021). Spatiotemporal variation and trends in equivalent black carbon in the Helsinki metropolitan area in Finland. *Atmospheric Chemistry and Physics*, 21(2). <https://doi.org/10.5194/acp-21-1173-2021>
- 575 Luoma, K., Virkkula, A., Aalto, P., Lehtipalo, K., Petäjä, T., & Kulmala, M. (2021). Effects of different correction algorithms on absorption coefficient - A comparison of three optical absorption photometers at a boreal forest site. *Atmospheric Measurement Techniques*, 14(10). <https://doi.org/10.5194/amt-14-6419-2021>
- Luoma, K., Virkkula, A., Aalto, P., Petäjä, T., & Kulmala, M. (2019). Over a 10-year record of aerosol optical properties at SMEAR II. *Atmospheric Chemistry and Physics*, 19(17). <https://doi.org/10.5194/acp-19-11363-2019>
- 580 Petäjä, T., Ovaska, A., Fung, P. L., Poutanen, P., Yli-Ojanperä, J., Suikkola, J., Laakso, M., Mäkelä, T., Niemi, J. V., Keskinen, J., Järvinen, A., Kuula, J., Kurppa, M., Hussein, T., Tarkoma, S., Kulmala, M., Karppinen, A., Manninen, H. E., & Timonen, H. (2021). Added Value of Vaisala AQT530 Sensors as a Part of a Sensor Network for Comprehensive Air Quality Monitoring. *Frontiers in Environmental Science*, 9. <https://doi.org/10.3389/fenvs.2021.719567>
- 585 Petzold, A., Ogren, J. A., Fiebig, M., Laj, P., Li, S.-M., Baltensperger, U., Holzer-Popp, T., Kinne, S., Pappalardo, G., Sugimoto, N., Wehrli, C., Wiedensohler, A., & Zhang, X.-Y. (2013). Recommendations for reporting “black carbon” measurements. *Atmospheric Chemistry and Physics*, 13(16), 8365–8379. <https://doi.org/10.5194/acp-13-8365-2013>
- Petzold, A., & Schönlinner, M. (2004). Multi-angle absorption photometry—a new method for the measurement of aerosol light absorption and atmospheric black carbon. *Journal of Aerosol Science*, 35(4), 421–441. <https://doi.org/https://doi.org/10.1016/j.jaerosci.2003.09.005>
- 590 Räsänen, P., Merikanto, J., Makkonen, R., Savolahti, M., Kirkevåg, A., Sand, M., Seland, Ø., & Partanen, A. I. (2022). Mapping the dependence of black carbon radiative forcing on emission region and season. *Atmospheric Chemistry and Physics*, 22(17). <https://doi.org/10.5194/acp-22-11579-2022>
- 595 Ravindra, K. (2019). Emission of black carbon from rural households kitchens and assessment of lifetime excess cancer risk in villages of North India. *Environment International*, 122. <https://doi.org/10.1016/j.envint.2018.11.008>
- Sahu, L. K., Kondo, Y., Miyazaki, Y., Pongkiatkul, P., & Kim Oanh, N. T. (2011). Seasonal and diurnal variations of black carbon and organic carbon aerosols in Bangkok. *Journal of Geophysical Research Atmospheres*, 116(15). <https://doi.org/10.1029/2010JD015563>



- 600 Sand, M., Berntsen, T. K., Seland, Ø., & Kristjánsson, J. E. (2013). Arctic surface temperature change to emissions of black carbon within Arctic or midlatitudes. *Journal of Geophysical Research Atmospheres*, 118(14).  
<https://doi.org/10.1002/jgrd.50613>
- Schmid, O., Artaxo, P., Arnott, W. P., Chand, D., Gatti, L. V., Frank, G. P., Hoffer, A., Schnaiter, M., & Andreae, M. O. (2006). Spectral light absorption by ambient aerosols influenced by biomass burning in the Amazon Basin. I: Comparison and field calibration of absorption measurement techniques. *Atmospheric Chemistry and Physics*, 6(11),  
605 3443–3462. <https://doi.org/10.5194/acp-6-3443-2006>
- Segersson, D., Eneroth, K., Gidhagen, L., Johansson, C., Omstedt, G., Nylén, A. E., & Forsberg, B. (2017). Health impact of PM<sub>10</sub>, PM<sub>2.5</sub> and black carbon exposure due to different source sectors in Stockholm, Gothenburg and Umea, Sweden. *International Journal of Environmental Research and Public Health*, 14(7).  
610 <https://doi.org/10.3390/ijerph14070742>
- Stocker, T. F., Qin, D., Plattner, G. K., Tignor, M. M. B., Allen, S. K., Boschung, J., Nauels, A., Xia, Y., Bex, V., & Midgley, P. M. (2013). Climate change 2013 the physical science basis: Working Group I contribution to the fifth assessment report of the intergovernmental panel on climate change. In *Climate Change 2013 the Physical Science Basis: Working Group I Contribution to the Fifth Assessment Report of the Intergovernmental Panel on Climate Change* (Vol. 9781107057999). <https://doi.org/10.1017/CBO9781107415324>  
615
- Teinilä, K., Timonen, H., Aurela, M., Kuula, J., Rönkkö, T., Hellèn, H., Loukkola, K., Kousa, A., Niemi, J. V., & Saarikoski, S. (2022). Characterization of particle sources and comparison of different particle metrics in an urban detached housing area, Finland. *Atmospheric Environment*, 272. <https://doi.org/10.1016/j.atmosenv.2022.118939>
- Tilastokeskus. (2023). *Statistics Finland: Population, Date accessed 01/12/2023*. [https://www.stat.fi/til/vrm\\_en.html](https://www.stat.fi/til/vrm_en.html)
- 620 Virkkula, A., Chi, X., Ding, A., Shen, Y., Nie, W., Qi, X., Zheng, L., Huang, X., Xie, Y., Wang, J., Petäjä, T., & Kulmala, M. (2015). On the interpretation of the loading correction of the aethalometer. *Atmospheric Measurement Techniques*, 8(10), 4415–4427. <https://doi.org/10.5194/amt-8-4415-2015>
- Virkkula, A., Mäkelä, T., Hillamo, R., Yli-Tuomi, T., Hirsikko, A., Hämeri, K., & Koponen, I. K. (2007). A Simple Procedure for Correcting Loading Effects of Aethalometer Data. *Journal of the Air & Waste Management Association*, 57(10), 1214–1222. <https://doi.org/10.3155/1047-3289.57.10.1214>  
625
- Weingartner, E., Saathoff, H., Schnaiter, M., Streit, N., Bitnar, B., & Baltensperger, U. (2003). Absorption of light by soot particles: determination of the absorption coefficient by means of aethalometers. *Journal of Aerosol Science*, 34(10), 1445–1463. [https://doi.org/https://doi.org/10.1016/S0021-8502\(03\)00359-8](https://doi.org/https://doi.org/10.1016/S0021-8502(03)00359-8)
- WHO. (2021). *WHO global air quality guidelines: particulate matter (PM<sub>2.5</sub> and PM<sub>10</sub>), ozone, nitrogen dioxide, sulfur dioxide and carbon monoxide*. World Health Organization.
- 630 Zaidan, M. A., Motlagh, N. H., Fung, P. L., Khalaf, A. S., Matsumi, Y., Ding, A., Tarkoma, S., Petaja, T., Kulmala, M., & Hussein, T. (2023). Intelligent Air Pollution Sensors Calibration for Extreme Events and Drifts Monitoring. *IEEE Transactions on Industrial Informatics*, 19(2). <https://doi.org/10.1109/TII.2022.3151782>
